# Supplementary material for: Whole Genome Distribution and Ethnic Differentiation of Copy Number Variation in Caucasian and Asian Populations
Source: PLoS One. 2009 Nov 23;4(11):e7958. doi: 10.1371/journal.pone.0007958 (PMC2776354; doi:10.1371/journal.pone.0007958)
Supplement: Table S3 — (0.20 MB XLS) [file pone.0007958.s005.xls]

## Sheet: Sheet1
Supplementary Table 3: Summary of 1135 CNVRs in CAU and CHI
Region_ID	Chromosome	Start	End	Length (bps)	# Probesets	CAU		CHI		CNV occurrence rate(%)
						# Loss	# Gain	# Loss	# Gain
region_1	chr1	792429	1920531	1128102	33	6	31	14	90	8.40787
region_2	chr1	2450787	2585920	135133	14	0	0	0	1	0.0596303
region_3	chr1	2736485	3428453	691968	111	0	2	0	1	0.178891
region_4	chr1	6013896	6156767	142871	16	0	0	0	1	0.0596303
region_5	chr1	8199071	9758050	1558979	214	1	0	0	0	0.0596303
region_6	chr1	10152705	10388768	236063	35	0	1	0	0	0.0596303
region_7	chr1	12844402	13233797	389395	3	82	24	41	8	9.2427
region_8	chr1	14999030	15463776	464746	119	0	0	0	2	0.119261
region_9	chr1	16549647	16790952	241305	21	6	22	10	17	3.27967
region_10	chr1	23714049	23828955	114906	10	0	0	1	0	0.0596303
region_11	chr1	26466822	26624823	158001	17	0	0	0	1	0.0596303	N
region_12	chr1	28684446	29257722	573276	38	1	0	0	3	0.238521
region_13	chr1	29730945	30631567	900622	259	0	1	0	0	0.0596303
region_14	chr1	32925738	33147656	221918	16	4	0	10	0	0.834824	N
region_15	chr1	35257637	35391711	134074	15	1	0	0	0	0.0596303	N
region_16	chr1	35512122	35589072	76950	12	0	0	0	1	0.0596303
region_17	chr1	35985664	36166442	180778	16	0	0	0	1	0.0596303	N
region_18	chr1	45254441	45498036	243595	25	0	0	0	1	0.0596303	N
region_19	chr1	45623126	46330654	707528	80	0	0	0	1	0.0596303
region_20	chr1	48339859	48538029	198170	38	0	0	1	0	0.0596303
region_21	chr1	49431923	49629104	197181	18	0	0	0	1	0.0596303	N
region_22	chr1	49670981	49897095	226114	11	1	0	0	0	0.0596303	N
region_23	chr1	51643145	51771429	128284	6	0	2	1	0	0.178891
region_24	chr1	54631480	55042651	411171	93	0	1	0	0	0.0596303
region_25	chr1	60170473	60462773	292300	60	0	0	1	0	0.0596303	N
region_26	chr1	65456988	65965894	508906	105	0	0	0	3	0.178891
region_27	chr1	71641989	72055371	413382	72	1	0	0	0	0.0596303	N
region_28	chr1	72620158	72782125	161967	29	1	0	0	0	0.0596303
region_29	chr1	73490121	73592675	102554	27	1	0	0	0	0.0596303	N
region_30	chr1	74108917	74284784	175867	19	1	0	0	0	0.0596303
region_31	chr1	75964032	76058853	94821	19	1	0	0	0	0.0596303	N
region_32	chr1	92180993	92388330	207337	18	0	1	0	0	0.0596303
region_33	chr1	102320598	102637342	316744	76	6	0	0	0	0.357782
region_34	chr1	103779021	103840794	61773	4	1	9	0	5	0.894454
region_35	chr1	104021153	104206653	185500	25	0	0	0	1	0.0596303
region_36	chr1	104963559	106162012	1198453	163	0	0	1	0	0.0596303
region_37	chr1	108566208	108601319	35111	9	1	0	0	0	0.0596303
region_38	chr1	108725500	108906937	181437	18	0	0	0	1	0.0596303
region_39	chr1	110431131	110643061	211930	55	0	1	0	0	0.0596303	N
region_40	chr1	112904647	113369580	464933	33	0	1	0	1	0.119261
region_41	chr1	116354200	116464438	110238	24	0	0	1	0	0.0596303
region_42	chr1	118858926	118987629	128703	25	0	0	0	1	0.0596303	N
region_43	chr1	120784882	120903122	118240	12	0	9	0	0	0.536673
region_44	chr1	141501392	143482819	1981427	68	22	24	13	18	4.59153
region_45	chr1	143700035	146524632	2824597	236	186	56	97	80	24.9851
region_46	chr1	149088070	149214350	126280	25	1	0	0	0	0.0596303
region_47	chr1	154174650	154566646	391996	103	0	1	0	0	0.0596303	N
region_48	chr1	158820989	159123809	302820	118	0	0	0	1	0.0596303
region_49	chr1	161908828	162360579	451751	170	0	1	0	0	0.0596303
region_50	chr1	171364962	171600481	235519	23	0	1	0	0	0.0596303
region_51	chr1	172182265	172511148	328883	115	0	1	0	0	0.0596303
region_52	chr1	185878837	186350169	471332	61	1	0	22	0	1.3715
region_53	chr1	190765362	190916222	150860	33	0	0	1	0	0.0596303	N
region_54	chr1	192072528	192225195	152667	16	1	0	0	0	0.0596303
region_55	chr1	193436824	193743293	306469	38	23	2	13	11	2.92188
region_56	chr1	196032402	196158017	125615	47	0	0	1	0	0.0596303	N
region_57	chr1	199346710	199509918	163208	35	0	1	0	0	0.0596303
region_58	chr1	221917596	222049323	131727	28	0	0	0	1	0.0596303
region_59	chr1	224618671	224850971	232300	34	1	0	0	0	0.0596303
region_60	chr1	226009240	226555474	546234	122	0	0	0	1	0.0596303
region_61	chr1	227804059	227914995	110936	19	0	0	1	0	0.0596303	N
region_62	chr1	229548325	229709409	161084	37	1	0	0	0	0.0596303
region_63	chr1	231599235	231769545	170310	19	0	0	0	2	0.119261	N
region_64	chr1	234931593	235117836	186243	61	0	1	0	0	0.0596303
region_65	chr1	235134609	235447392	312783	80	0	0	1	0	0.0596303	N
region_66	chr1	236226087	236569505	343418	89	0	0	0	1	0.0596303
region_67	chr1	238526925	238611745	84820	11	0	0	0	1	0.0596303	N
region_68	chr1	239329563	239629104	299541	28	0	1	1	10	0.715564
region_69	chr1	242120433	242429210	308777	75	2	0	1	0	0.178891
region_70	chr1	242939174	243127689	188515	28	0	1	0	0	0.0596303
region_71	chr1	244194154	245378187	1184033	125	6	4	10	2	1.31187
region_72	chr2	2994	200076	197082	36	0	0	3	1	0.238521
region_73	chr2	574523	716030	141507	59	0	0	0	1	0.0596303
region_74	chr2	926687	1196464	269777	43	0	0	0	2	0.119261
region_75	chr2	1747447	1906410	158963	23	0	0	0	1	0.0596303
region_76	chr2	2597097	3000334	403237	120	0	0	0	1	0.0596303	N
region_77	chr2	4795564	5047970	252406	46	0	0	0	1	0.0596303	N
region_78	chr2	11704553	11887189	182636	40	0	1	0	0	0.0596303	N
region_79	chr2	13431311	14367370	936059	196	0	0	0	7	0.417412
region_80	chr2	14599028	14721742	122714	36	2	0	0	0	0.119261
region_81	chr2	21350446	21475664	125218	38	0	1	0	0	0.0596303	N
region_82	chr2	21518731	21618855	100124	28	0	1	0	0	0.0596303	N
region_83	chr2	21648122	21854883	206761	39	0	1	0	0	0.0596303	N
region_84	chr2	21868131	22004747	136616	16	0	1	0	0	0.0596303	N
region_85	chr2	24792922	24930412	137490	25	0	0	0	1	0.0596303	N
region_86	chr2	25384435	25918130	533695	54	1	0	1	0	0.119261
region_87	chr2	32609562	33213993	604431	92	0	2	0	0	0.119261
region_88	chr2	33880946	35497621	1616675	381	2	1	0	2	0.298151
region_89	chr2	37930312	38089176	158864	44	0	0	0	1	0.0596303
region_90	chr2	39932848	40157115	224267	58	1	0	0	0	0.0596303	N
region_91	chr2	41018671	41169444	150773	32	1	0	0	0	0.0596303
region_92	chr2	41639053	41929769	290716	107	0	0	1	0	0.0596303
region_93	chr2	42720507	43720899	1000392	217	0	0	0	1	0.0596303	N
region_94	chr2	44414439	44504626	90187	21	1	0	0	0	0.0596303
region_95	chr2	50740682	50928762	188080	42	1	0	1	0	0.119261
region_96	chr2	52094280	52307118	212838	34	1	0	0	0	0.0596303
region_97	chr2	52339467	52861832	522365	89	1	0	2	1	0.238521
region_98	chr2	54171783	54583082	411299	80	0	1	0	0	0.0596303	N
region_99	chr2	56645514	56820842	175328	54	0	0	2	0	0.119261
region_100	chr2	57096713	57217859	121146	23	0	0	1	0	0.0596303
region_101	chr2	63385094	63519189	134095	26	0	1	0	0	0.0596303	N
region_102	chr2	63688806	63851068	162262	23	0	1	0	0	0.0596303	N
region_103	chr2	75704281	75867660	163379	36	0	0	0	2	0.119261
region_104	chr2	76750958	77122647	371689	69	0	1	0	0	0.0596303
region_105	chr2	77839969	77937231	97262	17	0	0	0	1	0.0596303
region_106	chr2	78519756	79897260	1377504	322	0	0	0	1	0.0596303
region_107	chr2	81193080	81397792	204712	33	0	0	1	0	0.0596303
region_108	chr2	83301518	83754427	452909	66	1	2	0	1	0.238521
region_109	chr2	86188053	86417111	229058	69	0	2	0	0	0.119261	N
region_110	chr2	86636725	86890553	253828	25	0	0	0	2	0.119261	N
region_111	chr2	86964810	87019869	55059	6	0	0	0	1	0.0596303
region_112	chr2	87308472	87828118	519646	5	10	237	58	8	18.6643
region_113	chr2	88133224	88366242	233018	41	0	0	0	1	0.0596303
region_114	chr2	89125032	95296731	6171699	30	81	19	69	18	11.1509
region_115	chr2	95617604	96220179	602575	16	2	1	0	1	0.238521
region_116	chr2	97090906	97478937	388031	16	4	3	4	12	1.3715
region_117	chr2	99237503	99388336	150833	16	0	1	0	0	0.0596303
region_118	chr2	106367756	107888455	1520699	258	1	0	0	0	0.0596303
region_119	chr2	108123191	108759592	636401	98	1	0	0	0	0.0596303
region_120	chr2	109614553	109816880	202327	12	1	0	0	0	0.0596303	N
region_121	chr2	110191936	110337721	145785	21	4	11	3	10	1.66965
region_122	chr2	111875008	112216266	341258	28	0	2	0	0	0.119261
region_123	chr2	112324053	112616252	292199	49	1	0	1	0	0.119261
region_124	chr2	114653565	114765906	112341	20	0	0	1	0	0.0596303	N
region_125	chr2	115414003	115660163	246160	46	0	0	0	1	0.0596303	N
region_126	chr2	116264756	116393250	128494	31	0	0	0	3	0.178891
region_127	chr2	117653459	117784583	131124	24	1	0	0	0	0.0596303	N
region_128	chr2	117912617	118164735	252118	76	1	0	0	0	0.0596303	N
region_129	chr2	119853285	120207131	353846	58	0	0	0	1	0.0596303	N
region_130	chr2	120377231	120665356	288125	27	0	0	0	5	0.298151
region_131	chr2	126156381	126957030	800649	114	0	1	0	0	0.0596303
region_132	chr2	127195480	127487236	291756	72	1	0	0	0	0.0596303
region_133	chr2	130684126	130859366	175240	9	20	1	13	1	2.08706
region_134	chr2	131914844	132244718	329874	40	2	1	1	5	0.536673
region_135	chr2	133608532	133767574	159042	59	0	0	1	0	0.0596303
region_136	chr2	143759249	143967241	207992	42	0	0	1	0	0.0596303	N
region_137	chr2	144551738	144689200	137462	14	1	0	0	0	0.0596303	N
region_138	chr2	147288881	147473910	185029	13	1	0	1	0	0.119261
region_139	chr2	149870160	150567975	697815	107	0	2	0	0	0.119261
region_140	chr2	152195560	153921485	1725925	300	1	0	5	1	0.417412
region_141	chr2	155735973	156185657	449684	52	0	0	1	1	0.119261
region_142	chr2	157892590	158375250	482660	62	0	4	0	0	0.238521	N
region_143	chr2	165551630	165692771	141141	28	0	1	0	0	0.0596303
region_144	chr2	168096866	168222033	125167	19	0	0	1	0	0.0596303	N
region_145	chr2	173250762	173702857	452095	101	0	1	0	0	0.0596303
region_146	chr2	176286775	176379150	92375	19	1	0	0	0	0.0596303	N
region_147	chr2	176684248	176801816	117568	17	1	0	0	0	0.0596303	N
region_148	chr2	184323029	184500756	177727	31	1	0	0	0	0.0596303
region_149	chr2	185480598	185678861	198263	23	0	0	0	1	0.0596303
region_150	chr2	185966919	186080594	113675	21	0	1	0	0	0.0596303	N
region_151	chr2	186229945	186616646	386701	52	0	0	5	0	0.298151	N
region_152	chr2	187878799	187985256	106457	19	1	0	0	0	0.0596303	N
region_153	chr2	188790134	188938317	148183	38	0	0	0	1	0.0596303
region_154	chr2	193334128	193926410	592282	63	3	0	2	0	0.298151	N
region_155	chr2	195258331	195469308	210977	30	0	0	0	1	0.0596303	N
region_156	chr2	195483475	195780690	297215	56	2	0	3	0	0.298151
region_157	chr2	197330270	197442612	112342	13	0	1	0	0	0.0596303	N
region_158	chr2	203294165	203395993	101828	12	0	0	2	0	0.119261	N
region_159	chr2	206993669	207086476	92807	10	0	0	0	1	0.0596303	N
region_160	chr2	214053451	214190910	137459	21	0	0	1	0	0.0596303
region_161	chr2	220729108	221094759	365651	104	0	0	0	1	0.0596303
region_162	chr2	221337068	221452311	115243	29	1	0	0	0	0.0596303	N
region_163	chr2	230564714	230664514	99800	10	0	1	0	0	0.0596303	N
region_164	chr2	233037366	233145482	108116	17	0	0	0	1	0.0596303
region_165	chr2	233918796	234120935	202139	38	0	0	0	1	0.0596303	N
region_166	chr2	236139432	236263620	124188	29	0	0	0	1	0.0596303	N
region_167	chr2	236302938	236474238	171300	32	1	0	0	0	0.0596303	N
region_168	chr2	236577608	236743699	166091	29	0	1	0	0	0.0596303
region_169	chr2	238968589	239112509	143920	23	0	0	0	1	0.0596303
region_170	chr2	239577519	239766738	189219	34	0	0	0	1	0.0596303
region_171	chr2	240311424	240848190	536766	103	0	0	0	2	0.119261
region_172	chr2	242362843	242730382	367539	18	73	1	2	2	4.65116
region_173	chr3	227344	1423595	1196251	326	1	4	0	1	0.357782
region_174	chr3	1795234	2079891	284657	78	1	0	0	1	0.119261
region_175	chr3	2284379	2403482	119103	37	0	0	1	0	0.0596303
region_176	chr3	3860463	4326751	466288	146	4	0	1	0	0.298151
region_177	chr3	5467216	7196165	1728949	502	1	2	0	1	0.238521
region_178	chr3	7774831	8578243	803412	268	1	0	0	1	0.119261
region_179	chr3	8848953	9140840	291887	104	0	1	0	0	0.0596303	N
region_180	chr3	10432314	10634768	202454	65	0	1	0	0	0.0596303
region_181	chr3	11397319	11466305	68986	12	1	0	0	0	0.0596303	N
region_182	chr3	12310816	12914829	604013	125	0	1	0	0	0.0596303	N
region_183	chr3	18784236	18881327	97091	14	0	0	0	1	0.0596303	N
region_184	chr3	21169645	21822602	652957	188	1	1	0	0	0.119261
region_185	chr3	22078922	22815411	736489	177	0	0	0	1	0.0596303
region_186	chr3	23633034	23857469	224435	44	0	1	0	0	0.0596303	N
region_187	chr3	33726022	33875683	149661	9	3	0	0	0	0.178891	N
region_188	chr3	36034756	36228957	194201	71	0	0	6	0	0.357782
region_189	chr3	36246637	36302493	55856	16	0	0	2	0	0.119261
region_190	chr3	36491330	36630641	139311	23	1	0	0	0	0.0596303	N
region_191	chr3	37924180	38051640	127460	19	0	0	3	0	0.178891
region_192	chr3	41028383	41120029	91646	27	1	0	0	0	0.0596303
region_193	chr3	41559511	41852418	292907	46	1	0	1	0	0.119261
region_194	chr3	41915452	42051626	136174	17	0	0	0	1	0.0596303	N
region_195	chr3	44552617	44750329	197712	17	2	0	0	0	0.119261	N
region_196	chr3	47755721	47987801	232080	18	0	0	0	1	0.0596303
region_197	chr3	48702116	49063116	361000	12	18	2	0	0	1.19261	N
region_198	chr3	49621985	49870085	248100	25	0	1	0	1	0.119261
region_199	chr3	51509761	51678104	168343	8	0	0	1	0	0.0596303	N
region_200	chr3	52926195	53100962	174767	24	3	0	1	0	0.238521
region_201	chr3	57580337	57746762	166425	13	0	0	1	0	0.0596303
region_202	chr3	59932870	60255783	322913	152	0	0	1	0	0.0596303
region_203	chr3	65089529	65172526	82997	36	0	1	0	0	0.0596303
region_204	chr3	75146328	75362679	216351	30	0	0	1	0	0.0596303
region_205	chr3	75446248	75973756	527508	43	58	72	49	49	13.5957
region_206	chr3	78891806	79124765	232959	32	1	0	0	0	0.0596303	N
region_207	chr3	80343870	84578809	4234939	526	2	1	2	1	0.357782
region_208	chr3	89718321	89994452	276131	26	0	0	1	0	0.0596303
region_209	chr3	90147205	90346746	199541	9	2	0	0	0	0.119261	N
region_210	chr3	95031169	95164179	133010	8	3	1	1	0	0.298151	N
region_211	chr3	99907923	100722305	814382	171	0	1	0	1	0.119261
region_212	chr3	101659050	101962117	303067	47	0	3	0	1	0.238521
region_213	chr3	102854612	102932423	77811	7	0	1	0	0	0.0596303	N
region_214	chr3	105077688	105586566	508878	84	0	0	0	1	0.0596303
region_215	chr3	109879346	110113810	234464	49	1	0	0	0	0.0596303	N
region_216	chr3	112805709	113357716	552007	125	0	1	0	0	0.0596303
region_217	chr3	118474291	118591841	117550	31	0	0	1	0	0.0596303	N
region_218	chr3	119020129	119239225	219096	46	0	0	1	0	0.0596303	N
region_219	chr3	137586618	137744442	157824	8	1	0	0	0	0.0596303
region_220	chr3	142754914	143080236	325322	66	0	0	0	1	0.0596303
region_221	chr3	143336624	143498288	161664	17	0	4	0	0	0.238521
region_222	chr3	146178051	146387799	209748	28	0	1	0	0	0.0596303	N
region_223	chr3	146926107	147268295	342188	67	1	0	0	0	0.0596303
region_224	chr3	152897008	153301316	404308	62	1	0	0	1	0.119261
region_225	chr3	153533571	153663738	130167	19	0	1	0	0	0.0596303
region_226	chr3	159503080	160117391	614311	93	0	0	1	2	0.178891	N
region_227	chr3	162830573	163132218	301645	70	1	0	2	0	0.178891
region_228	chr3	163366476	163499147	132671	30	0	1	0	0	0.0596303
region_229	chr3	163627190	164687057	1059867	180	1	1	5	0	0.417412
region_230	chr3	165545058	165651859	106801	12	1	0	0	0	0.0596303	N
region_231	chr3	167211170	167454380	243210	36	0	0	1	0	0.0596303	N
region_232	chr3	175120093	175466916	346823	71	0	1	0	0	0.0596303	N
region_233	chr3	178330290	178446223	115933	19	0	0	0	1	0.0596303	N
region_234	chr3	189603442	189830439	226997	42	1	0	0	0	0.0596303
region_235	chr3	192803637	193034181	230544	37	1	0	0	0	0.0596303
region_236	chr3	194933315	195102699	169384	46	0	1	0	0	0.0596303	N
region_237	chr3	195899423	196202608	303185	80	0	0	0	1	0.0596303
region_238	chr3	196743569	199063671	2320102	192	21	14	19	5	3.51819
region_239	chr4	19099	542862	523763	40	0	4	0	2	0.357782
region_240	chr4	3121273	3276745	155472	32	0	0	0	1	0.0596303	N
region_241	chr4	4093125	4133515	40390	5	0	0	0	1	0.0596303
region_242	chr4	5031014	5160880	129866	48	0	1	0	0	0.0596303	N
region_243	chr4	9048572	10094700	1046128	319	2	11	4	14	1.84854
region_244	chr4	10510524	11049753	539229	173	0	1	1	0	0.119261	N
region_245	chr4	12053746	12358377	304631	61	0	1	0	0	0.0596303
region_246	chr4	14735706	15512506	776800	183	0	1	0	1	0.119261
region_247	chr4	18840742	18965208	124466	33	0	1	0	0	0.0596303
region_248	chr4	20944165	21069246	125081	38	0	0	1	0	0.0596303
region_249	chr4	27981812	28109512	127700	30	1	0	0	0	0.0596303	N
region_250	chr4	28379403	28546480	167077	37	2	0	0	0	0.119261
region_251	chr4	29747285	29986956	239671	25	1	0	0	0	0.0596303
region_252	chr4	31225440	32933565	1708125	223	1	1	1	0	0.178891
region_253	chr4	33061479	33467532	406053	57	0	0	0	1	0.0596303
region_254	chr4	33711200	33790507	79307	13	1	0	0	0	0.0596303	N
region_255	chr4	33943849	33993430	49581	6	1	0	0	0	0.0596303
region_256	chr4	35227860	35467742	239882	60	1	0	0	0	0.0596303
region_257	chr4	38954742	39063548	108806	15	0	1	0	0	0.0596303	N
region_258	chr4	45907284	46160919	253635	36	0	0	3	0	0.178891
region_259	chr4	48722599	48904407	181808	17	0	0	0	2	0.119261
region_260	chr4	49334998	49350542	15544	3	46	126	70	50	17.412
region_261	chr4	52539564	53082235	542671	90	2	1	1	0	0.238521
region_262	chr4	57177237	57370514	193277	34	0	0	1	0	0.0596303	N
region_263	chr4	60063008	61553844	1490836	264	0	1	1	0	0.119261
region_264	chr4	62742704	63414725	672021	106	0	0	0	1	0.0596303	N
region_265	chr4	64158232	64825446	667214	88	0	0	1	1	0.119261
region_266	chr4	69213372	69318438	105066	3	123	175	0	215	30.5903
region_267	chr4	69772009	70125769	353760	73	0	0	1	0	0.0596303
region_268	chr4	72685072	72856674	171602	31	0	0	1	0	0.0596303
region_269	chr4	79371196	79539951	168755	46	1	0	0	0	0.0596303
region_270	chr4	79908771	80040746	131975	15	1	0	0	0	0.0596303	N
region_271	chr4	87145926	87431427	285501	51	0	0	0	1	0.0596303
region_272	chr4	87587780	87775623	187843	19	1	0	0	0	0.0596303
region_273	chr4	92877597	93677775	800178	67	0	1	0	0	0.0596303	N
region_274	chr4	94192124	94386667	194543	21	1	0	2	0	0.178891
region_275	chr4	99304504	99715177	410673	62	0	2	0	0	0.119261	N
region_276	chr4	102428849	102600539	171690	52	0	0	1	0	0.0596303	N
region_277	chr4	102641076	102848910	207834	36	1	0	0	0	0.0596303	N
region_278	chr4	105324444	105659646	335202	29	1	0	0	2	0.178891	N
region_279	chr4	106188754	107075920	887166	146	0	0	2	0	0.119261
region_280	chr4	108095102	108378513	283411	49	0	0	0	1	0.0596303
region_281	chr4	110068756	110232094	163338	39	0	1	0	0	0.0596303	N
region_282	chr4	113349925	113455310	105385	19	0	0	0	1	0.0596303	N
region_283	chr4	115466969	115692313	225344	36	0	0	1	0	0.0596303
region_284	chr4	117262991	118073986	810995	116	1	2	0	0	0.178891
region_285	chr4	122908404	123446495	538091	92	0	1	0	0	0.0596303
region_286	chr4	129256638	129444069	187431	21	1	0	6	0	0.417412	N
region_287	chr4	130113843	130270950	157107	24	0	1	0	0	0.0596303
region_288	chr4	131387176	132144601	757425	133	0	1	0	0	0.0596303
region_289	chr4	132320223	132688498	368275	44	0	1	0	1	0.119261
region_290	chr4	133884313	134144178	259865	68	0	0	1	0	0.0596303
region_291	chr4	136991500	137197189	205689	29	1	0	0	0	0.0596303	N
region_292	chr4	145132367	145448965	316598	37	0	0	1	3	0.238521
region_293	chr4	145538533	145716737	178204	39	0	0	1	0	0.0596303	N
region_294	chr4	146280735	146385039	104304	8	0	1	0	0	0.0596303
region_295	chr4	151705805	152383574	677769	53	1	1	0	0	0.119261
region_296	chr4	161104660	161250472	145812	28	0	1	0	0	0.0596303	N
region_297	chr4	165850001	165937976	87975	25	0	0	0	1	0.0596303
region_298	chr4	165964037	166284391	320354	75	0	0	0	1	0.0596303
region_299	chr4	169054081	169310331	256250	36	2	0	2	0	0.238521
region_300	chr4	170414285	171250645	836360	119	0	0	1	0	0.0596303	N
region_301	chr4	171639721	172096052	456331	87	0	1	0	0	0.0596303
region_302	chr4	178492586	180195340	1702754	325	0	0	0	1	0.0596303
region_303	chr4	183422855	183688502	265647	72	0	1	0	0	0.0596303	N
region_304	chr4	186356136	186702382	346246	51	0	0	1	3	0.238521
region_305	chr4	187190246	187646115	455869	97	0	0	1	0	0.0596303
region_306	chr4	187940305	188803889	863584	164	0	0	1	0	0.0596303
region_307	chr4	188833028	189231522	398494	51	2	0	0	0	0.119261
region_308	chr4	189538747	191306043	1767296	271	0	3	6	7	0.954085
region_309	chr5	81949	329200	247251	31	0	2	0	0	0.119261
region_310	chr5	671586	972497	300911	36	2	28	11	46	5.18784
region_311	chr5	1107831	1269775	161944	19	0	0	0	2	0.119261
region_312	chr5	7799427	8972349	1172922	336	0	0	0	1	0.0596303
region_313	chr5	10251605	10335396	83791	23	0	1	0	0	0.0596303
region_314	chr5	11756037	12362601	606564	110	0	1	0	0	0.0596303
region_315	chr5	12409700	13465248	1055548	124	0	1	0	0	0.0596303
region_316	chr5	15675075	15868413	193338	34	10	0	0	0	0.596303
region_317	chr5	17409166	17931903	522737	64	0	2	1	0	0.178891
region_318	chr5	19058621	19500207	441586	62	0	0	2	0	0.119261
region_319	chr5	21564561	21735999	171438	23	0	1	0	0	0.0596303
region_320	chr5	22734964	22904390	169426	22	0	0	0	1	0.0596303
region_321	chr5	28956329	29064307	107978	37	0	0	1	0	0.0596303	N
region_322	chr5	32083420	32273282	189862	30	0	0	0	1	0.0596303
region_323	chr5	37527967	37789629	261662	29	0	2	0	0	0.119261	N
region_324	chr5	44760271	45056288	296017	23	4	0	0	0	0.238521	N
region_325	chr5	45615550	46419092	803542	26	217	37	203	16	28.2051	N
region_326	chr5	49596616	49934585	337969	24	0	0	0	1	0.0596303
region_327	chr5	50009789	50268956	259167	39	0	1	0	0	0.0596303
region_328	chr5	68543391	68769454	226063	15	0	0	3	0	0.178891
region_329	chr5	73311766	73929900	618134	181	0	1	0	0	0.0596303	N
region_330	chr5	79928959	80055809	126850	18	1	0	0	0	0.0596303
region_331	chr5	80108358	80224521	116163	17	0	0	0	1	0.0596303	N
region_332	chr5	83813535	83920759	107224	10	2	0	0	0	0.119261	N
region_333	chr5	92293550	92501435	207885	35	0	0	1	0	0.0596303	N
region_334	chr5	96069816	96320877	251061	62	0	2	0	0	0.119261	N
region_335	chr5	96963814	97244313	280499	35	5	0	1	0	0.357782
region_336	chr5	97421007	97538239	117232	20	1	0	0	0	0.0596303
region_337	chr5	98869989	99164462	294473	38	0	0	0	1	0.0596303
region_338	chr5	99528287	99843001	314714	34	0	0	4	0	0.238521
region_339	chr5	100563825	101207948	644123	136	2	1	1	0	0.238521
region_340	chr5	101307948	101541884	233936	42	2	0	0	0	0.119261
region_341	chr5	101900036	102157182	257146	60	0	0	1	0	0.0596303
region_342	chr5	103802011	105061227	1259216	199	1	1	2	0	0.238521
region_343	chr5	105593687	105875766	282079	20	6	0	0	1	0.417412	N
region_344	chr5	107735007	107982384	247377	37	0	0	0	1	0.0596303	N
region_345	chr5	108317786	108653223	335437	48	1	0	0	0	0.0596303
region_346	chr5	114614849	114849566	234717	59	0	0	3	0	0.178891
region_347	chr5	115517593	115697363	179770	73	0	0	1	0	0.0596303
region_348	chr5	117791521	118009945	218424	50	0	0	1	0	0.0596303
region_349	chr5	119011313	119703661	692348	119	0	1	0	0	0.0596303	N
region_350	chr5	120597319	120717766	120447	18	0	0	1	0	0.0596303
region_351	chr5	121620462	121854840	234378	48	0	1	0	0	0.0596303	N
region_352	chr5	130083823	130588027	504204	58	0	1	0	0	0.0596303
region_353	chr5	132199947	132312150	112203	16	0	1	0	0	0.0596303	N
region_354	chr5	137316693	137626465	309772	22	1	2	0	0	0.178891	N
region_355	chr5	138694271	138800989	106718	7	0	2	0	0	0.119261	N
region_356	chr5	139842958	140071299	228341	31	0	0	0	1	0.0596303
region_357	chr5	145177758	145265514	87756	22	0	0	0	1	0.0596303	N
region_358	chr5	148717407	148869211	151804	35	0	0	1	0	0.0596303	N
region_359	chr5	148934310	149135028	200718	53	0	1	0	0	0.0596303
region_360	chr5	151401972	151513091	111119	57	0	0	0	1	0.0596303
region_361	chr5	154724681	154891408	166727	59	0	0	4	0	0.238521
region_362	chr5	155433570	155584316	150746	33	0	0	1	0	0.0596303
region_363	chr5	170286644	170443021	156377	15	0	1	0	0	0.0596303	N
region_364	chr5	175503757	175570975	67218	18	0	1	1	0	0.119261
region_365	chr5	176780625	176837482	56857	5	0	0	0	1	0.0596303	N
region_366	chr5	177310254	177346265	36011	12	5	0	0	0	0.298151	N
region_367	chr5	178532223	178949488	417265	86	0	1	0	4	0.298151
region_368	chr5	180068839	180177803	108964	22	0	1	0	0	0.0596303
region_369	chr6	110391	908496	798105	202	0	2	1	0	0.178891
region_370	chr6	4174687	4451489	276802	100	1	0	0	0	0.0596303
region_371	chr6	4917550	5057852	140302	50	0	1	0	0	0.0596303
region_372	chr6	7140008	7284370	144362	29	0	0	0	1	0.0596303	N
region_373	chr6	10555115	10800507	245392	49	1	0	1	0	0.119261
region_374	chr6	26705903	26862629	156726	17	0	0	0	1	0.0596303
region_375	chr6	28033806	28186390	152584	35	1	0	0	0	0.0596303
region_376	chr6	28959887	29139121	179234	30	0	0	0	1	0.0596303
region_377	chr6	31456001	31664560	208559	67	1	0	10	0	0.655933
region_378	chr6	38279876	38453795	173919	40	0	0	1	0	0.0596303
region_379	chr6	54407429	54536419	128990	22	0	0	1	0	0.0596303	N
region_380	chr6	55459241	55623518	164277	38	0	0	2	0	0.119261	N
region_381	chr6	57609008	58262500	653492	55	0	9	0	0	0.536673
region_382	chr6	58398624	63029224	4630600	193	1	9	7	0	1.01371
region_383	chr6	63572152	63692223	120071	13	0	0	1	0	0.0596303
region_384	chr6	65204550	65306692	102142	22	0	0	0	1	0.0596303	N
region_385	chr6	65872602	66008777	136175	31	1	0	0	0	0.0596303
region_386	chr6	66999063	67180548	181485	33	8	0	0	0	0.477042
region_387	chr6	68197504	68677397	479893	71	0	0	0	2	0.119261
region_388	chr6	76900942	77352316	451374	73	0	0	4	0	0.238521
region_389	chr6	77606066	77939659	333593	67	1	0	1	0	0.119261	N
region_390	chr6	79202676	79747009	544333	87	0	0	0	1	0.0596303
region_391	chr6	80142782	80388824	246042	71	0	0	0	2	0.119261
region_392	chr6	81389596	81498758	109162	29	0	0	1	0	0.0596303	N
region_393	chr6	87493494	87657032	163538	21	0	0	1	0	0.0596303
region_394	chr6	90364704	90702336	337632	59	0	1	0	0	0.0596303	N
region_395	chr6	91979977	92219420	239443	27	1	0	0	0	0.0596303
region_396	chr6	94041750	94278491	236741	51	0	0	1	0	0.0596303	N
region_397	chr6	94425193	95313484	888291	148	2	1	0	0	0.178891
region_398	chr6	95335150	95730630	395480	59	8	0	7	0	0.894454
region_399	chr6	97853965	98011949	157984	17	1	0	0	0	0.0596303	N
region_400	chr6	98899980	100372844	1472864	315	0	0	0	1	0.0596303	N
region_401	chr6	100434037	100716822	282785	42	0	1	0	0	0.0596303	N
region_402	chr6	102071607	102526006	454399	78	0	0	0	1	0.0596303	N
region_403	chr6	103537117	103797351	260234	49	0	0	1	0	0.0596303
region_404	chr6	103858540	104282504	423964	92	1	0	0	0	0.0596303
region_405	chr6	104388324	105180934	792610	135	0	0	0	1	0.0596303
region_406	chr6	109165877	109490352	324475	49	0	1	0	0	0.0596303	N
region_407	chr6	110052440	110232327	179887	45	0	0	0	1	0.0596303
region_408	chr6	114398275	114671437	273162	51	0	0	0	1	0.0596303
region_409	chr6	118823011	119218662	395651	63	0	1	0	1	0.119261	N
region_410	chr6	120299557	120442077	142520	22	0	0	0	1	0.0596303	N
region_411	chr6	123560693	124445468	884775	184	1	1	0	0	0.119261
region_412	chr6	129306876	129536583	229707	52	0	1	0	0	0.0596303
region_413	chr6	129954780	130655077	700297	174	0	1	0	0	0.0596303
region_414	chr6	140502701	141103111	600410	45	1	0	0	0	0.0596303
region_415	chr6	142116008	142295669	179661	26	0	0	1	0	0.0596303	N
region_416	chr6	150466102	150646187	180085	48	0	0	0	1	0.0596303
region_417	chr6	150674152	150797287	123135	30	0	0	0	1	0.0596303
region_418	chr6	151605972	151755869	149897	35	0	0	0	2	0.119261
region_419	chr6	157270542	157559270	288728	53	0	0	0	2	0.119261
region_420	chr6	159137292	159407003	269711	51	0	1	0	0	0.0596303
region_421	chr6	161733723	163229671	1495948	337	1	3	3	1	0.477042
region_422	chr6	166718207	167042359	324152	87	1	0	0	0	0.0596303
region_423	chr6	167135730	167380182	244452	69	1	0	0	0	0.0596303	N
region_424	chr6	167778631	168059105	280474	46	0	1	0	0	0.0596303
region_425	chr6	168112476	168452631	340155	60	0	34	0	0	2.02743
region_426	chr6	169007796	169206076	198280	59	0	0	0	1	0.0596303
region_427	chr7	141322	294586	153264	41	1	1	0	2	0.238521
region_428	chr7	568372	685996	117624	22	1	0	0	0	0.0596303
region_429	chr7	1161916	1402617	240701	11	0	0	0	1	0.0596303
region_430	chr7	1448862	1775974	327112	36	2	8	0	1	0.655933
region_431	chr7	3156844	3354632	197788	48	1	0	0	0	0.0596303
region_432	chr7	4082226	4387211	304985	76	1	0	1	0	0.119261
region_433	chr7	4549788	5046362	496574	48	0	0	0	1	0.0596303	N
region_434	chr7	5416386	5722612	306226	52	0	0	0	2	0.119261
region_435	chr7	6196040	6401482	205442	33	0	0	0	1	0.0596303	N
region_436	chr7	6439741	6526934	87193	12	0	3	0	0	0.178891
region_437	chr7	7376351	8337374	961023	258	0	0	0	1	0.0596303
region_438	chr7	8941742	9134349	192607	48	0	0	1	0	0.0596303
region_439	chr7	9482991	9600065	117074	24	0	0	1	0	0.0596303
region_440	chr7	9823141	9902238	79097	25	0	0	1	0	0.0596303	N
region_441	chr7	12036529	12183947	147418	33	1	0	0	0	0.0596303
region_442	chr7	13853944	13989682	135738	40	0	0	0	1	0.0596303
region_443	chr7	15124517	15400855	276338	57	2	0	1	0	0.178891	N
region_444	chr7	16078495	16241347	162852	50	0	0	6	0	0.357782
region_445	chr7	16732684	17408359	675675	135	0	1	0	2	0.178891
region_446	chr7	25442447	25589617	147170	51	1	0	0	0	0.0596303	N
region_447	chr7	35266418	35580972	314554	101	0	0	0	1	0.0596303
region_448	chr7	37992590	38144574	151984	31	0	0	1	0	0.0596303
region_449	chr7	39817522	39934919	117397	20	0	0	0	2	0.119261
region_450	chr7	48554153	48719009	164856	38	0	1	0	0	0.0596303
region_451	chr7	55665975	55811192	145217	9	0	0	1	0	0.0596303
region_452	chr7	57010879	62350279	5339400	124	58	46	67	55	13.4764
region_453	chr7	62908492	63032331	123839	19	1	1	0	1	0.178891	N
region_454	chr7	63042247	63576255	534008	103	1	1	0	4	0.357782
region_455	chr7	64172228	64512781	340553	30	8	4	4	1	1.01371
region_456	chr7	71652094	71712945	60851	9	1	2	2	0	0.298151
region_457	chr7	72200171	72249063	48892	7	0	0	1	0	0.0596303
region_458	chr7	73182718	73416518	233800	17	0	0	0	1	0.0596303
region_459	chr7	73513102	73734580	221478	5	15	41	3	11	4.17412
region_460	chr7	74730572	74730572	1	1	2	4	2	9	1.01371
region_461	chr7	75781935	76210401	428466	39	2	13	2	10	1.61002
region_462	chr7	78139988	78403978	263990	57	0	0	1	0	0.0596303
region_463	chr7	83015496	83148084	132588	27	1	0	0	0	0.0596303
region_464	chr7	83802831	83947528	144697	21	1	0	0	0	0.0596303	N
region_465	chr7	91475800	91623593	147793	12	0	0	0	1	0.0596303	N
region_466	chr7	99122077	99335658	213581	24	0	0	0	1	0.0596303
region_467	chr7	100488915	100771718	282803	37	0	7	0	0	0.417412
region_468	chr7	104401158	104747193	346035	31	0	0	0	1	0.0596303
region_469	chr7	106671892	106832398	160506	18	0	0	0	1	0.0596303	N
region_470	chr7	108324347	108771684	447337	81	0	0	1	0	0.0596303	N
region_471	chr7	110462028	110824769	362741	25	3	0	5	0	0.477042
region_472	chr7	111593448	111856762	263314	39	0	0	0	1	0.0596303
region_473	chr7	112933126	113258012	324886	35	0	0	1	0	0.0596303
region_474	chr7	114357424	114486279	128855	18	1	0	0	0	0.0596303	N
region_475	chr7	114620691	114798293	177602	25	1	0	0	0	0.0596303	N
region_476	chr7	117533962	117730291	196329	28	2	0	0	0	0.119261
region_477	chr7	121840943	122383330	542387	105	0	1	0	0	0.0596303
region_478	chr7	124889742	125301636	411894	98	1	0	0	0	0.0596303
region_479	chr7	125695077	125950298	255221	50	0	0	0	1	0.0596303	N
region_480	chr7	126090464	126318452	227988	40	0	0	1	0	0.0596303
region_481	chr7	132231158	132481519	250361	37	1	0	0	0	0.0596303	N
region_482	chr7	143009934	143304180	294246	54	0	0	0	1	0.0596303
region_483	chr7	144901757	145938994	1037237	169	2	0	0	0	0.119261	N
region_484	chr7	148752436	149343695	591259	57	0	3	0	13	0.954085
region_485	chr7	149745850	149992232	246382	54	0	0	1	0	0.0596303
region_486	chr7	151187389	151447295	259906	20	0	0	0	2	0.119261	N
region_487	chr7	151937470	152210872	273402	43	2	0	0	0	0.119261	N
region_488	chr7	152268290	152537275	268985	77	0	1	0	0	0.0596303
region_489	chr7	152867412	153165792	298380	47	0	1	0	13	0.834824
region_490	chr7	153324263	153371858	47595	27	0	1	0	0	0.0596303	N
region_491	chr7	154004057	154502353	498296	169	0	1	0	1	0.119261
region_492	chr7	156212079	156309111	97032	28	0	0	0	1	0.0596303	N
region_493	chr7	156463000	156716531	253531	46	0	0	0	1	0.0596303
region_494	chr7	157212566	157334736	122170	32	0	1	0	0	0.0596303
region_495	chr7	157884594	158129373	244779	49	0	1	0	0	0.0596303
region_496	chr7	158191526	158413646	222120	32	0	0	1	1	0.119261
region_497	chr7	158471707	158626108	154401	27	0	0	0	1	0.0596303
region_498	chr8	955780	1603101	647321	164	0	1	1	0	0.119261
region_499	chr8	1757869	2053440	295571	93	0	1	0	1	0.119261
region_500	chr8	2137112	3292439	1155327	363	1	4	0	20	1.49076
region_501	chr8	4528471	4663986	135515	59	0	0	1	0	0.0596303
region_502	chr8	5123201	5221083	97882	52	0	0	1	0	0.0596303
region_503	chr8	5365302	5638409	273107	148	1	0	0	0	0.0596303
region_504	chr8	5655483	6211403	555920	262	1	1	1	0	0.178891
region_505	chr8	7222992	7278542	55550	2	218	107	158	90	34.1682
region_506	chr8	8106541	8209852	103311	36	0	2	0	1	0.178891
region_507	chr8	10928805	11621250	692445	175	0	0	0	1	0.0596303
region_508	chr8	12039387	12526350	486963	15	227	164	75	109	34.2874
region_509	chr8	13642515	13724575	82060	24	1	0	0	0	0.0596303
region_510	chr8	14218917	14498282	279365	88	1	0	0	0	0.0596303
region_511	chr8	15537788	16605490	1067702	297	4	0	2	2	0.477042
region_512	chr8	18300156	18586760	286604	97	0	0	0	1	0.0596303	N
region_513	chr8	20218747	20387149	168402	63	0	0	0	1	0.0596303
region_514	chr8	31207801	31392134	184333	36	0	0	0	1	0.0596303	N
region_515	chr8	31514214	31678918	164704	38	1	0	0	0	0.0596303	N
region_516	chr8	34700480	35031792	331312	66	0	0	0	1	0.0596303	N
region_517	chr8	38091099	38162915	71816	14	0	0	1	0	0.0596303
region_518	chr8	38229372	38460911	231539	16	0	0	0	1	0.0596303
region_519	chr8	39111924	39423310	311386	20	69	0	19	0	5.24747
region_520	chr8	43071141	43820269	749128	35	0	1	12	5	1.07335
region_521	chr8	47043376	47405858	362482	13	0	0	0	3	0.178891
region_522	chr8	48367867	48414151	46284	6	0	1	0	0	0.0596303
region_523	chr8	49108173	49438908	330735	27	0	0	0	1	0.0596303
region_524	chr8	53734627	53972817	238190	43	0	0	0	1	0.0596303
region_525	chr8	56942219	57067684	125465	40	0	2	0	0	0.119261	N
region_526	chr8	58377571	58724117	346546	72	0	1	0	1	0.119261
region_527	chr8	69551771	70042740	490969	79	0	1	0	0	0.0596303
region_528	chr8	73700768	74128325	427557	113	0	1	0	0	0.0596303
region_529	chr8	76364801	76492706	127905	24	0	0	0	1	0.0596303
region_530	chr8	80216654	80408224	191570	45	0	0	1	0	0.0596303
region_531	chr8	86910517	87162391	251874	31	0	0	0	1	0.0596303
region_532	chr8	87256056	87433354	177298	34	0	1	0	0	0.0596303	N
region_533	chr8	89617838	90017741	399903	52	0	0	1	0	0.0596303	N
region_534	chr8	92147433	92297693	150260	17	0	0	6	0	0.357782
region_535	chr8	94906986	95019897	112911	19	0	0	2	0	0.119261
region_536	chr8	99705405	100260959	555554	22	16	0	22	1	2.32558
region_537	chr8	115731770	115963575	231805	48	0	0	0	1	0.0596303
region_538	chr8	131617749	131832588	214839	70	0	1	0	0	0.0596303	N
region_539	chr8	132770686	132864960	94274	27	0	0	1	0	0.0596303	N
region_540	chr8	135703187	135858400	155213	47	0	0	0	1	0.0596303
region_541	chr8	137661228	138050665	389437	103	47	0	1	0	2.86225
region_542	chr8	138360536	138765842	405306	139	0	0	0	1	0.0596303	N
region_543	chr8	138779167	139361942	582775	195	0	1	0	0	0.0596303
region_544	chr8	143899694	143999285	99591	20	0	1	0	0	0.0596303
region_545	chr8	146225933	146264218	38285	4	0	1	0	2	0.178891
region_546	chr9	30910	464928	434018	100	39	6	59	3	6.38044
region_547	chr9	500546	766349	265803	111	0	1	0	0	0.0596303
region_548	chr9	955006	1301310	346304	133	0	1	0	1	0.119261
region_549	chr9	4048403	4648662	600259	225	0	1	0	0	0.0596303
region_550	chr9	6054103	6437439	383336	87	0	0	1	0	0.0596303
region_551	chr9	6592066	6694475	102409	38	0	0	1	0	0.0596303
region_552	chr9	6835101	7236606	401505	178	0	0	1	0	0.0596303
region_553	chr9	7999571	8177876	178305	50	1	0	0	0	0.0596303
region_554	chr9	8875088	8977006	101918	30	1	0	0	0	0.0596303	N
region_555	chr9	9186248	9523062	336814	108	0	0	1	0	0.0596303
region_556	chr9	9897839	10175596	277757	104	0	0	1	0	0.0596303
region_557	chr9	10764641	12451648	1687007	374	11	1	14	0	1.55039
region_558	chr9	14915706	15022733	107027	13	0	0	1	0	0.0596303	N
region_559	chr9	17544809	17797508	252699	101	0	0	1	0	0.0596303
region_560	chr9	18231747	18353377	121630	34	0	0	0	1	0.0596303
region_561	chr9	23285433	23479527	194094	41	1	0	0	0	0.0596303
region_562	chr9	24424206	24554198	129992	17	3	0	0	0	0.178891
region_563	chr9	26216392	26434299	217907	52	2	0	0	0	0.119261
region_564	chr9	26680740	26767704	86964	28	0	0	1	0	0.0596303	N
region_565	chr9	26775734	26832670	56936	10	0	0	1	0	0.0596303	N
region_566	chr9	28154681	28370244	215563	51	1	0	0	0	0.0596303	N
region_567	chr9	28550130	28787505	237375	55	3	0	2	0	0.298151
region_568	chr9	29877375	29981403	104028	25	1	0	0	0	0.0596303
region_569	chr9	30136063	30626428	490365	100	4	0	1	1	0.357782
region_570	chr9	31884144	32156137	271993	82	2	0	0	0	0.119261
region_571	chr9	42525734	44108554	1582820	11	434	366	278	326	83.7209
region_572	chr9	64197638	67730415	3532777	7	206	123	230	231	47.1079
region_573	chr9	71152771	71513163	360392	81	0	1	0	0	0.0596303
region_574	chr9	75126299	75745271	618972	159	1	0	0	0	0.0596303	N
region_575	chr9	89487602	90153782	666180	159	0	1	0	1	0.119261
region_576	chr9	94300989	94588754	287765	63	0	0	1	0	0.0596303	N
region_577	chr9	102910896	103476993	566097	106	1	0	0	0	0.0596303	N
region_578	chr9	111427748	111601185	173437	44	0	1	0	0	0.0596303	N
region_579	chr9	116044647	116435359	390712	99	0	1	0	0	0.0596303	N
region_580	chr9	120685655	120810962	125307	26	1	0	0	0	0.0596303
region_581	chr9	122223977	122519331	295354	74	1	0	0	0	0.0596303	N
region_582	chr9	128719719	128964356	244637	14	0	0	0	1	0.0596303
region_583	chr9	135343106	135560182	217076	54	0	5	0	0	0.298151
region_584	chr9	136732049	136936239	204190	12	0	3	0	0	0.178891
region_585	chr9	137173001	137722643	549642	12	0	0	0	1	0.0596303
region_586	chr10	101955	433074	331119	45	0	1	0	0	0.0596303
region_587	chr10	2066253	2247286	181033	72	0	0	0	1	0.0596303
region_588	chr10	6689941	6885786	195845	75	1	0	0	5	0.357782
region_589	chr10	7585946	7815172	229226	71	0	1	0	0	0.0596303
region_590	chr10	12404212	12563135	158923	37	0	0	1	0	0.0596303	N
region_591	chr10	15097764	15288172	190408	32	0	0	0	1	0.0596303	N
region_592	chr10	20786206	20949210	163004	46	0	0	1	0	0.0596303
region_593	chr10	22001870	22187429	185559	7	0	1	0	0	0.0596303	N
region_594	chr10	25381004	26204413	823409	201	0	1	0	0	0.0596303
region_595	chr10	27199996	27358782	158786	41	1	0	0	0	0.0596303
region_596	chr10	27550197	27799912	249715	57	5	0	0	0	0.298151
region_597	chr10	34731325	35776321	1044996	142	0	2	0	1	0.178891
region_598	chr10	38245839	39064552	818713	83	0	1	4	1	0.357782
region_599	chr10	41753546	42186291	432745	6	17	15	16	11	3.51819
region_600	chr10	44497660	44732650	234990	64	0	3	0	0	0.178891
region_601	chr10	45344626	45536421	191795	17	3	0	2	0	0.298151
region_602	chr10	46363383	47485249	1121866	54	47	139	15	40	14.3709
region_603	chr10	49033015	49121003	87988	25	0	0	0	2	0.119261
region_604	chr10	49279184	49817088	537904	192	0	1	0	0	0.0596303
region_605	chr10	51162308	51256520	94212	12	0	1	1	0	0.119261
region_606	chr10	51455332	51493715	38383	9	0	4	0	1	0.298151
region_607	chr10	54086531	54215596	129065	40	0	0	0	1	0.0596303	N
region_608	chr10	56233486	57028802	795316	110	0	0	1	1	0.119261
region_609	chr10	57056331	57304818	248487	57	0	0	2	0	0.119261	N
region_610	chr10	57946551	58104365	157814	25	1	0	0	0	0.0596303
region_611	chr10	58516581	58697195	180614	42	0	0	1	0	0.0596303
region_612	chr10	59192071	59479052	286981	78	0	0	3	0	0.178891
region_613	chr10	67694508	67896186	201678	50	1	0	0	0	0.0596303
region_614	chr10	67944973	68246083	301110	83	3	0	3	0	0.357782
region_615	chr10	68376585	68600561	223976	47	0	4	0	0	0.238521
region_616	chr10	73320745	73417597	96852	21	0	0	1	0	0.0596303	N
region_617	chr10	74112823	74342405	229582	11	0	2	0	0	0.119261
region_618	chr10	74429632	74975791	546159	48	0	0	0	24	1.43113	N
region_619	chr10	79139618	79263477	123859	36	0	0	0	1	0.0596303
region_620	chr10	80817954	80921350	103396	24	0	0	0	1	0.0596303	N
region_621	chr10	82421393	82915023	493630	112	3	0	0	1	0.238521
region_622	chr10	88946867	89060725	113858	3	2	0	0	0	0.119261
region_623	chr10	92122851	92604382	481531	106	0	1	0	0	0.0596303
region_624	chr10	93703343	93882133	178790	22	1	0	0	0	0.0596303	N
region_625	chr10	103175171	103321634	146463	17	0	0	0	1	0.0596303	N
region_626	chr10	104819783	105854556	1034773	157	0	1	1	0	0.119261
region_627	chr10	106010210	106761131	750921	222	0	0	0	1	0.0596303	N
region_628	chr10	107881980	108174880	292900	97	0	0	1	0	0.0596303
region_629	chr10	110655496	111225357	569861	137	0	1	1	0	0.119261
region_630	chr10	116251340	116895525	644185	123	0	1	0	0	0.0596303	N
region_631	chr10	125047287	125157751	110464	41	1	0	0	0	0.0596303
region_632	chr10	131540391	131765405	225014	45	0	0	0	1	0.0596303
region_633	chr10	135073302	135323432	250130	53	1	41	1	17	3.57782
region_634	chr11	196767	373554	176787	29	0	0	0	1	0.0596303
region_635	chr11	932344	1101474	169130	25	0	0	0	1	0.0596303
region_636	chr11	3320422	3376078	55656	21	0	0	0	1	0.0596303
region_637	chr11	4094880	4282368	187488	33	0	1	0	0	0.0596303
region_638	chr11	5444172	5890620	446448	176	0	0	0	1	0.0596303
region_639	chr11	17718456	17980543	262087	61	0	0	0	1	0.0596303	N
region_640	chr11	18813971	19000725	186754	67	2	0	2	0	0.238521
region_641	chr11	21733244	21844210	110966	40	1	0	0	0	0.0596303
region_642	chr11	21973246	22091947	118701	23	0	0	1	0	0.0596303	N
region_643	chr11	23286060	25144003	1857943	380	0	1	0	0	0.0596303
region_644	chr11	25377186	25628233	251047	54	0	0	1	0	0.0596303
region_645	chr11	26914585	27230666	316081	90	0	1	0	0	0.0596303	N
region_646	chr11	27791113	28019544	228431	37	0	0	0	1	0.0596303	N
region_647	chr11	28440208	29271957	831749	142	0	1	1	0	0.119261
region_648	chr11	30343603	31411551	1067948	214	0	0	1	1	0.119261
region_649	chr11	32549131	32820212	271081	35	0	0	0	1	0.0596303
region_650	chr11	34565941	34750600	184659	64	0	1	0	0	0.0596303
region_651	chr11	38267971	38466276	198305	43	0	0	0	1	0.0596303
region_652	chr11	39341866	39444614	102748	15	0	0	1	0	0.0596303	N
region_653	chr11	40483594	40579952	96358	31	1	0	0	0	0.0596303
region_654	chr11	42944099	43052316	108217	32	0	0	1	0	0.0596303	N
region_655	chr11	46421970	46816001	394031	20	0	0	2	0	0.119261	N
region_656	chr11	47558317	47709351	151034	13	0	0	0	1	0.0596303
region_657	chr11	48419662	49068043	648381	62	0	2	10	6	1.07335
region_658	chr11	50023474	55112298	5088824	139	5	4	19	13	2.44484
region_659	chr11	58161043	59004826	843783	156	0	1	0	0	0.0596303
region_660	chr11	60046799	60188058	141259	25	0	0	0	1	0.0596303	N
region_661	chr11	64527755	64708003	180248	17	0	0	0	1	0.0596303	N
region_662	chr11	66845296	66952813	107517	7	0	1	0	0	0.0596303	N
region_663	chr11	67220113	67599397	379284	18	0	1	9	0	0.596303
region_664	chr11	80457064	80677194	220130	63	0	0	1	0	0.0596303
region_665	chr11	83990352	84177194	186842	23	0	0	1	0	0.0596303	N
region_666	chr11	86749458	87167052	417594	106	0	0	0	1	0.0596303
region_667	chr11	89082984	89106380	23396	9	2	0	0	0	0.119261
region_668	chr11	90589604	90773228	183624	40	0	0	4	0	0.238521
region_669	chr11	96105483	96230931	125448	50	0	1	0	0	0.0596303	N
region_670	chr11	96580285	97450907	870622	174	0	1	4	0	0.298151
region_671	chr11	99747560	99882763	135203	24	0	0	3	0	0.178891	N
region_672	chr11	103469637	106417979	2948342	599	1	1	0	0	0.119261
region_673	chr11	107163263	107311199	147936	23	0	0	2	0	0.119261
region_674	chr11	125556526	125798495	241969	45	0	1	0	0	0.0596303	N
region_675	chr11	128559769	128782502	222733	48	0	0	0	1	0.0596303	N
region_676	chr11	132285244	132760766	475522	114	0	1	0	0	0.0596303
region_677	chr11	133261397	134286231	1024834	231	0	11	0	1	0.715564
region_678	chr11	134377514	134449982	72468	21	0	0	0	3	0.178891
region_679	chr12	4960481	5442242	481761	197	0	0	1	1	0.119261	N
region_680	chr12	7845302	8058808	213506	29	5	1	2	1	0.536673
region_681	chr12	10935199	11830795	895596	160	0	0	0	2	0.119261
region_682	chr12	20790587	21009723	219136	42	1	0	0	0	0.0596303
region_683	chr12	21036277	21317714	281437	52	1	0	0	0	0.0596303	N
region_684	chr12	21950884	22202405	251521	38	0	1	0	0	0.0596303
region_685	chr12	24400854	25170626	769772	224	0	1	0	2	0.178891
region_686	chr12	25689655	25876110	186455	48	0	1	0	0	0.0596303	N
region_687	chr12	28474060	28630291	156231	67	0	0	1	0	0.0596303	N
region_688	chr12	31169298	31404985	235687	45	0	42	0	3	2.68336
region_689	chr12	32340866	36391876	4051010	382	5	4	4	6	1.13298
region_690	chr12	36604027	37129708	525681	64	0	2	7	0	0.536673
region_691	chr12	38815911	39033729	217818	50	1	0	0	0	0.0596303	N
region_692	chr12	40296986	40712722	415736	113	0	0	0	1	0.0596303	N
region_693	chr12	48433032	48706351	273319	48	0	1	0	0	0.0596303	N
region_694	chr12	48896588	49093837	197249	23	0	1	0	0	0.0596303	N
region_695	chr12	53281471	53456005	174534	50	0	0	0	1	0.0596303	N
region_696	chr12	59006001	59461320	455319	59	1	0	0	0	0.0596303
region_697	chr12	62057279	62204701	147422	32	0	0	1	0	0.0596303
region_698	chr12	62261464	62474717	213253	19	6	1	2	0	0.536673
region_699	chr12	72596016	72695401	99385	9	0	0	2	0	0.119261	N
region_700	chr12	73498794	73922733	423939	76	1	0	0	0	0.0596303
region_701	chr12	78939801	79470868	531067	104	0	1	0	0	0.0596303	N
region_702	chr12	80770485	81072493	302008	60	0	0	1	0	0.0596303	N
region_703	chr12	81978893	82393162	414269	79	1	0	0	0	0.0596303
region_704	chr12	90741261	91039294	298033	74	1	0	0	0	0.0596303
region_705	chr12	95631113	95745693	114580	26	0	0	1	0	0.0596303	N
region_706	chr12	98544631	98681118	136487	16	0	0	1	0	0.0596303
region_707	chr12	101312097	101713526	401429	114	0	0	0	1	0.0596303	N
region_708	chr12	104365896	104765990	400094	123	0	0	1	0	0.0596303
region_709	chr12	106912383	106995612	83229	35	1	0	0	0	0.0596303	N
region_710	chr12	107996249	108087016	90767	21	0	2	0	0	0.119261
region_711	chr12	113004974	113090860	85886	63	0	0	1	0	0.0596303
region_712	chr12	122099718	122347383	247665	27	0	1	0	2	0.178891
region_713	chr12	129242399	129731229	488830	147	0	2	0	0	0.119261
region_714	chr12	130077971	130186213	108242	26	0	0	1	0	0.0596303
region_715	chr12	130455366	130821104	365738	70	0	1	0	1	0.119261
region_716	chr12	131617891	131636496	18605	2	1	0	2	0	0.178891
region_717	chr12	131991326	132254227	262901	31	0	0	0	2	0.119261
region_718	chr13	17960319	18548695	588376	79	2	5	4	5	0.954085
region_719	chr13	19017195	19386155	368960	36	0	1	0	1	0.119261
region_720	chr13	21452991	22026337	573346	165	0	2	0	0	0.119261
region_721	chr13	22442058	22673454	231396	78	0	1	0	0	0.0596303
region_722	chr13	23691489	23791694	100205	37	0	1	0	0	0.0596303
region_723	chr13	24811798	25309537	497739	108	1	0	1	0	0.119261	N
region_724	chr13	31120677	31260554	139877	38	1	0	0	0	0.0596303	N
region_725	chr13	40082078	40462422	380344	44	0	2	0	0	0.119261	N
region_726	chr13	42416940	42646496	229556	47	0	1	0	0	0.0596303
region_727	chr13	49404067	50783720	1379653	248	0	0	1	0	0.0596303
region_728	chr13	51858710	51944837	86127	5	0	0	0	3	0.178891	N
region_729	chr13	54014816	54409565	394749	72	1	0	0	0	0.0596303
region_730	chr13	55092179	55290268	198089	32	0	0	1	0	0.0596303	N
region_731	chr13	56355405	56949242	593837	75	0	0	5	0	0.298151
region_732	chr13	63100213	63290222	190009	25	1	0	0	0	0.0596303
region_733	chr13	63322252	63832160	509908	110	1	0	0	0	0.0596303
region_734	chr13	64426409	64592782	166373	21	0	1	0	0	0.0596303
region_735	chr13	65863412	66063164	199752	37	0	0	3	0	0.178891
region_736	chr13	66078046	66372638	294592	73	1	0	0	0	0.0596303
region_737	chr13	67796857	67919047	122190	24	0	0	0	1	0.0596303	N
region_738	chr13	80901981	81130086	228105	45	0	0	1	0	0.0596303	N
region_739	chr13	82728487	83104607	376120	63	2	0	1	1	0.238521
region_740	chr13	86812117	86896653	84536	16	1	0	0	0	0.0596303	N
region_741	chr13	95719288	96096938	377650	62	1	0	0	0	0.0596303	N
region_742	chr13	98095085	98469034	373949	86	0	0	0	1	0.0596303	N
region_743	chr13	100765374	101237279	471905	128	0	0	0	1	0.0596303	N
region_744	chr13	104327533	104743461	415928	102	1	0	0	0	0.0596303
region_745	chr13	112538166	112695191	157025	32	0	0	0	1	0.0596303
region_746	chr13	113479759	113645940	166181	12	0	2	0	3	0.298151
region_747	chr14	19272965	19633680	360715	62	271	228	188	166	50.8646
region_748	chr14	21360617	22075626	715009	219	1	0	10	0	0.655933
region_749	chr14	24515019	24796900	281881	65	0	2	0	0	0.119261	N
region_750	chr14	26437506	27140343	702837	137	3	0	0	0	0.178891
region_751	chr14	31714140	32700447	986307	230	0	2	0	0	0.119261
region_752	chr14	33448637	34060439	611802	127	0	0	0	1	0.0596303
region_753	chr14	34243375	34538917	295542	33	0	0	0	1	0.0596303
region_754	chr14	39470077	39727004	256927	54	2	0	1	0	0.178891
region_755	chr14	41838826	42103975	265149	32	0	0	7	0	0.417412
region_756	chr14	42452112	43377262	925150	111	0	4	2	1	0.417412
region_757	chr14	43848866	44034036	185170	28	0	1	0	0	0.0596303
region_758	chr14	47261360	47644807	383447	75	2	0	0	0	0.119261
region_759	chr14	47850488	47994398	143910	23	2	0	0	0	0.119261	N
region_760	chr14	51073653	51319909	246256	68	0	0	0	1	0.0596303	N
region_761	chr14	51559203	51773621	214418	73	0	0	1	0	0.0596303	N
region_762	chr14	55195951	55479684	283733	67	0	0	0	1	0.0596303	N
region_763	chr14	57017761	57293364	275603	70	0	0	0	1	0.0596303	N
region_764	chr14	57820655	57892786	72131	3	0	0	0	2	0.119261	N
region_765	chr14	65772609	65986106	213497	44	0	0	2	0	0.119261	N
region_766	chr14	66146903	66322788	175885	20	0	1	0	0	0.0596303	N
region_767	chr14	80536415	80717631	181216	26	0	1	0	0	0.0596303
region_768	chr14	82246445	82492039	245594	71	0	0	1	0	0.0596303	N
region_769	chr14	86113305	86342781	229476	31	1	0	1	0	0.119261
region_770	chr14	92931405	93070695	139290	14	0	0	0	1	0.0596303	N
region_771	chr14	102194812	102375968	181156	15	0	0	1	0	0.0596303
region_772	chr14	103662771	103946058	283287	23	0	2	0	2	0.238521	N
region_773	chr14	105071276	106356482	1285206	72	79	56	37	66	14.192
region_774	chr15	18427103	20005562	1578459	93	328	380	247	261	72.5104
region_775	chr15	20042468	20773725	731257	58	229	261	153	203	50.4472
region_776	chr15	21847665	22393551	545886	68	21	22	34	4	4.83005
region_777	chr15	26113882	26203954	90072	11	0	0	0	1	0.0596303
region_778	chr15	26768706	27177475	408769	40	0	0	0	1	0.0596303
region_779	chr15	28393128	28864940	471812	9	70	10	29	13	7.2749
region_780	chr15	29735243	30298847	563604	98	0	12	0	13	1.49076
region_781	chr15	32564059	32757965	193906	33	6	0	0	0	0.357782
region_782	chr15	37000183	37202704	202521	69	0	1	0	0	0.0596303	N
region_783	chr15	39239973	39376299	136326	12	4	0	0	0	0.238521	N
region_784	chr15	39607260	39878677	271417	24	2	0	0	0	0.119261
region_785	chr15	41604209	41721187	116978	8	1	0	5	0	0.357782
region_786	chr15	41834930	41970010	135080	12	0	0	1	1	0.119261
region_787	chr15	50284225	50360167	75942	22	1	0	0	0	0.0596303	N
region_788	chr15	54653674	55542988	889314	143	0	5	0	0	0.298151
region_789	chr15	57145185	57470291	325106	69	1	0	0	0	0.0596303
region_790	chr15	61381284	61565014	183730	46	0	0	1	0	0.0596303
region_791	chr15	62772657	63094541	321884	39	0	2	0	0	0.119261	N
region_792	chr15	63510635	63865123	354488	37	0	0	0	2	0.119261	N
region_793	chr15	73430812	73735726	304914	11	0	2	0	0	0.119261	N
region_794	chr15	74654705	74844919	190214	18	1	0	0	0	0.0596303
region_795	chr15	75856486	76053782	197296	33	0	1	0	0	0.0596303
region_796	chr15	76056527	76098398	41871	9	0	1	0	0	0.0596303	N
region_797	chr15	77530008	77713350	183342	99	0	1	0	0	0.0596303	N
region_798	chr15	82618970	82917298	298328	11	0	2	0	1	0.178891
region_799	chr15	83626571	83934263	307692	84	0	2	0	0	0.119261
region_800	chr15	86294466	86391497	97031	17	0	0	0	1	0.0596303	N
region_801	chr15	86406551	86839816	433265	110	0	0	0	1	0.0596303	N
region_802	chr15	86847787	86981889	134102	34	0	0	0	1	0.0596303	N
region_803	chr15	91184744	91318697	133953	17	0	0	0	1	0.0596303	N
region_804	chr15	91719966	91810520	90554	47	0	1	0	0	0.0596303	N
region_805	chr15	91976025	92087264	111239	28	1	0	0	0	0.0596303
region_806	chr15	96692416	97096569	404153	76	0	1	0	0	0.0596303	N
region_807	chr15	97319281	97627107	307826	63	0	0	1	0	0.0596303	N
region_808	chr15	98136438	98641293	504855	115	0	1	0	0	0.0596303
region_809	chr15	99808834	100033288	224454	37	0	2	0	0	0.119261
region_810	chr15	100070375	100210760	140385	13	0	4	0	2	0.357782
region_811	chr16	26671	536443	509772	61	0	0	0	2	0.119261
region_812	chr16	2652029	2699500	47471	7	0	0	0	2	0.119261
region_813	chr16	5466493	5634563	168070	71	1	0	0	0	0.0596303
region_814	chr16	6732189	7021963	289774	91	5	0	1	0	0.357782
region_815	chr16	7134152	7407490	273338	155	0	0	1	0	0.0596303	N
region_816	chr16	7749603	7875119	125516	39	1	0	0	0	0.0596303
region_817	chr16	8861823	9090078	228255	47	0	1	0	0	0.0596303	N
region_818	chr16	13250773	13423575	172802	53	0	0	2	0	0.119261	N
region_819	chr16	14522688	14668235	145547	11	0	2	0	0	0.119261
region_820	chr16	14993255	16260667	1267412	141	6	2	3	2	0.775194
region_821	chr16	16540862	16638105	97243	5	3	38	18	35	5.60525
region_822	chr16	18514090	18514090	1	1	0	0	1	1	0.119261
region_823	chr16	18687337	18774795	87458	15	2	0	0	0	0.119261
region_824	chr16	18865289	19121838	256549	45	0	1	0	2	0.178891
region_825	chr16	21441805	22089994	648189	32	5	18	10	2	2.08706
region_826	chr16	22466298	22688093	221795	27	11	1	11	0	1.3715
region_827	chr16	24337751	24500126	162375	23	0	1	0	0	0.0596303	N
region_828	chr16	25318069	25397686	79617	32	0	0	1	0	0.0596303	N
region_829	chr16	27086003	27574677	488674	77	0	1	0	0	0.0596303	N
region_830	chr16	28398018	28949515	551497	23	2	11	0	4	1.01371
region_831	chr16	29122799	29320004	197205	10	1	0	0	0	0.0596303
region_832	chr16	29559989	30085308	525319	32	0	1	4	0	0.298151
region_833	chr16	31675715	33847701	2171986	17	240	141	164	66	36.4341
region_834	chr16	34268070	34654032	385962	39	0	156	0	0	9.30233
region_835	chr16	67386522	67657169	270647	42	0	0	0	1	0.0596303	N
region_836	chr16	68421181	68748619	327438	42	1	4	2	7	0.834824
region_837	chr16	69294699	69471152	176453	31	0	0	0	1	0.0596303
region_838	chr16	69516009	69651126	135117	15	0	1	0	0	0.0596303
region_839	chr16	71190806	71332309	141503	16	1	0	0	0	0.0596303
region_840	chr16	75267588	75355973	88385	8	1	0	0	0	0.0596303
region_841	chr16	81203284	81405558	202274	106	1	0	0	0	0.0596303	N
region_842	chr16	82493533	82953062	459529	135	2	0	0	0	0.119261
region_843	chr16	86928168	87017970	89802	11	1	0	0	0	0.0596303
region_844	chr16	87404625	87560132	155507	17	0	1	0	0	0.0596303
region_845	chr16	87650240	88028531	378291	37	0	2	0	0	0.119261
region_846	chr17	6888	198273	191385	29	0	0	0	1	0.0596303
region_847	chr17	560251	787555	227304	28	0	0	0	1	0.0596303
region_848	chr17	883601	1150367	266766	16	0	1	1	0	0.119261
region_849	chr17	2082815	2325288	242473	36	0	0	0	1	0.0596303
region_850	chr17	9075422	9433483	358061	75	0	0	1	0	0.0596303
region_851	chr17	9968291	10304916	336625	62	0	0	0	1	0.0596303	N
region_852	chr17	16601446	16741605	140159	9	1	0	9	0	0.596303
region_853	chr17	18190336	18308103	117767	9	0	0	1	0	0.0596303
region_854	chr17	19923065	20161920	238855	35	3	0	0	3	0.357782
region_855	chr17	20403550	20587119	183569	7	1	0	0	0	0.0596303
region_856	chr17	20990750	21126953	136203	12	0	0	0	1	0.0596303	N
region_857	chr17	21217319	21491135	273816	22	2	7	0	8	1.01371
region_858	chr17	21641572	22069633	428061	31	5	2	7	0	0.834824
region_859	chr17	22367498	22978483	610985	75	1	0	0	2	0.178891
region_860	chr17	23329994	23362019	32025	9	1	0	0	0	0.0596303	N
region_861	chr17	24603749	24672764	69015	8	1	0	0	0	0.0596303	N
region_862	chr17	25755541	25960929	205388	17	0	0	0	3	0.178891
region_863	chr17	26016686	26289747	273061	21	0	0	0	5	0.298151	N
region_864	chr17	31378996	31501499	122503	53	2	34	0	16	3.10078
region_865	chr17	32481442	33285140	803698	102	0	1	0	0	0.0596303
region_866	chr17	33664392	33678831	14439	2	0	0	1	0	0.0596303
region_867	chr17	34640425	34837398	196973	20	0	1	0	1	0.119261
region_868	chr17	38722927	38856821	133894	10	0	4	0	1	0.298151
region_869	chr17	40813669	41022689	209020	21	1	0	0	1	0.119261
region_870	chr17	41426926	41719833	292907	86	1	411	0	8	25.0447
region_871	chr17	42971429	43057279	85850	5	0	0	1	0	0.0596303
region_872	chr17	44402113	44573998	171885	19	0	0	1	0	0.0596303
region_873	chr17	47822052	48026031	203979	44	2	0	0	0	0.119261
region_874	chr17	49599985	49726285	126300	19	0	0	1	0	0.0596303
region_875	chr17	54264925	54463325	198400	9	0	0	2	0	0.119261
region_876	chr17	54727880	54956527	228647	25	0	1	0	0	0.0596303
region_877	chr17	57672361	57845878	173517	11	0	1	0	2	0.178891
region_878	chr17	58308456	58471243	162787	18	1	0	0	0	0.0596303	N
region_879	chr17	59204033	59342655	138622	21	0	0	1	0	0.0596303
region_880	chr17	60022521	60185134	162613	10	0	0	1	0	0.0596303
region_881	chr17	63635027	63696899	61872	11	1	0	0	0	0.0596303	N
region_882	chr17	69337118	70235037	897919	163	0	3	0	1	0.238521
region_883	chr17	74054212	74205146	150934	30	0	0	0	1	0.0596303
region_884	chr17	74857410	75050112	192702	25	0	1	0	0	0.0596303
region_885	chr17	76724504	76914079	189575	14	0	1	0	0	0.0596303
region_886	chr17	77043823	77303541	259718	29	0	0	0	1	0.0596303
region_887	chr17	77536764	78173520	636756	53	0	1	0	3	0.238521
region_888	chr18	508222	723474	215252	57	0	1	0	0	0.0596303
region_889	chr18	1449708	1880177	430469	107	4	0	0	1	0.298151
region_890	chr18	2768382	2938632	170250	34	0	0	0	1	0.0596303	N
region_891	chr18	7044431	7585927	541496	129	0	0	0	8	0.477042	N
region_892	chr18	10890614	11038468	147854	42	0	0	0	1	0.0596303	N
region_893	chr18	14878726	15096727	218001	16	2	0	9	0	0.655933
region_894	chr18	16849138	16962488	113350	8	0	1	0	0	0.0596303	N
region_895	chr18	17054573	17241274	186701	16	0	0	2	0	0.119261	N
region_896	chr18	24782107	24997438	215331	33	0	1	0	0	0.0596303	N
region_897	chr18	25263554	26753735	1490181	237	0	1	0	0	0.0596303
region_898	chr18	29450139	29655848	205709	60	1	0	0	0	0.0596303	N
region_899	chr18	31758275	31980483	222208	31	0	0	0	1	0.0596303	N
region_900	chr18	34662416	35076989	414573	66	1	0	0	0	0.0596303
region_901	chr18	36451024	36544275	93251	43	0	0	0	1	0.0596303
region_902	chr18	46515455	46825370	309915	64	0	0	0	1	0.0596303	N
region_903	chr18	56169611	56374311	204700	48	0	0	0	1	0.0596303
region_904	chr18	61812118	61908224	96106	29	0	0	1	0	0.0596303
region_905	chr18	61980603	62160305	179702	41	8	0	0	0	0.477042
region_906	chr18	63270694	63910615	639921	142	1	0	0	0	0.0596303
region_907	chr18	64613397	64915926	302529	87	0	0	1	0	0.0596303
region_908	chr18	66494570	67771798	1277228	286	0	0	2	1	0.178891
region_909	chr18	67955521	68287196	331675	75	0	0	1	0	0.0596303
region_910	chr18	75474284	75740573	266289	46	0	0	0	3	0.178891
region_911	chr18	75940689	76115554	174865	35	0	0	0	1	0.0596303
region_912	chr19	212033	303660	91627	9	0	0	1	0	0.0596303
region_913	chr19	340397	626513	286116	20	0	0	0	1	0.0596303
region_914	chr19	938571	1531189	592618	18	0	0	3	4	0.417412
region_915	chr19	1627419	2234140	606721	31	0	0	7	2	0.536673
region_916	chr19	3131770	3316639	184869	12	0	1	0	0	0.0596303
region_917	chr19	4643354	4803137	159783	14	1	0	0	0	0.0596303	N
region_918	chr19	6847380	7063265	215885	52	1	3	0	0	0.238521
region_919	chr19	10310665	10527450	216785	18	0	0	1	0	0.0596303	N
region_920	chr19	12350726	12578847	228121	20	0	0	0	1	0.0596303
region_921	chr19	17573374	18201910	628536	52	0	0	0	1	0.0596303
region_922	chr19	18600497	18721919	121422	9	0	1	0	0	0.0596303	N
region_923	chr19	20286128	20809514	523386	62	4	4	8	0	0.954085
region_924	chr19	21864073	23052723	1188650	134	0	0	1	4	0.298151
region_925	chr19	23354569	24297477	942908	161	5	0	0	1	0.357782
region_926	chr19	32651846	32855288	203442	9	3	0	13	1	1.01371
region_927	chr19	32900851	33125194	224343	48	0	0	0	1	0.0596303
region_928	chr19	38208281	38354470	146189	21	0	1	0	0	0.0596303	N
region_929	chr19	39721599	39917372	195773	40	0	0	0	1	0.0596303
region_930	chr19	41155075	41302030	146955	13	0	0	0	1	0.0596303
region_931	chr19	42309276	42515651	206375	12	0	0	0	2	0.119261
region_932	chr19	46332233	46496816	164583	17	0	0	0	1	0.0596303	N
region_933	chr19	47932219	48646755	714536	56	60	8	48	9	7.45379
region_934	chr19	50548766	50850313	301547	15	0	0	0	2	0.119261	N
region_935	chr19	52031293	52210724	179431	9	0	0	0	3	0.178891
region_936	chr19	53731615	54029049	297434	18	0	0	0	1	0.0596303
region_937	chr19	54493318	54839864	346546	18	0	0	4	0	0.238521
region_938	chr19	56951383	57280344	328961	46	0	3	0	0	0.178891
region_939	chr19	58246052	58472244	226192	41	0	0	0	1	0.0596303
region_940	chr19	60586030	60763105	177075	13	0	0	0	1	0.0596303
region_941	chr19	60848259	61495185	646926	123	0	1	0	0	0.0596303
region_942	chr19	62426660	62719315	292655	56	0	0	0	3	0.178891
region_943	chr19	62783689	63522073	738384	97	0	1	0	1	0.119261
region_944	chr20	2930521	2993797	63276	18	0	0	0	1	0.0596303
region_945	chr20	3918173	4056360	138187	46	0	0	1	0	0.0596303	N
region_946	chr20	7628673	7985545	356872	76	0	0	0	1	0.0596303
region_947	chr20	8076442	8501337	424895	82	0	1	0	0	0.0596303
region_948	chr20	9014932	9211914	196982	31	0	0	0	2	0.119261
region_949	chr20	14471712	15271282	799570	192	7	0	6	0	0.775194
region_950	chr20	15328660	15544432	215772	75	1	0	0	0	0.0596303
region_951	chr20	18258171	18504618	246447	62	1	0	0	0	0.0596303	N
region_952	chr20	21142738	21301479	158741	26	0	1	0	0	0.0596303
region_953	chr20	24649605	24803729	154124	39	1	0	0	0	0.0596303	N
region_954	chr20	25415359	25669248	253889	30	1	0	0	0	0.0596303
region_955	chr20	26020582	26236535	215953	17	0	1	0	2	0.178891
region_956	chr20	28106854	28143658	36804	4	13	62	5	4	5.00894
region_957	chr20	29309964	29447102	137138	18	0	0	1	1	0.119261
region_958	chr20	32202347	32377195	174848	15	0	1	0	0	0.0596303	N
region_959	chr20	33308354	33456505	148151	25	0	0	0	1	0.0596303
region_960	chr20	35098973	35315395	216422	30	0	0	1	0	0.0596303
region_961	chr20	36170753	36431069	260316	52	1	1	0	0	0.119261
region_962	chr20	45779460	46093333	313873	64	0	1	0	0	0.0596303
region_963	chr20	46097891	46583675	485784	126	0	1	0	0	0.0596303
region_964	chr20	60445712	60585093	139381	15	0	1	0	0	0.0596303
region_965	chr21	9887804	14136067	4248263	45	45	69	44	153	18.545
region_966	chr21	19196589	19344445	147856	51	0	0	0	1	0.0596303	N
region_967	chr21	23299700	23577959	278259	64	0	0	1	0	0.0596303
region_968	chr21	24911290	25032989	121699	42	1	0	0	0	0.0596303	N
region_969	chr21	31856983	31956763	99780	19	0	1	0	0	0.0596303	N
region_970	chr21	36430513	36587841	157328	39	0	5	0	0	0.298151
region_971	chr21	40006754	40396614	389860	175	0	0	0	1	0.0596303	N
region_972	chr21	42810316	42981312	170996	45	0	1	0	0	0.0596303
region_973	chr21	44260426	44369022	108596	15	0	0	0	1	0.0596303
region_974	chr21	46389340	46573884	184544	32	0	0	0	1	0.0596303
region_975	chr22	14433758	15570854	1137096	35	100	122	72	124	24.9255
region_976	chr22	17265521	19786161	2520640	338	4	9	2	6	1.25224
region_977	chr22	20130955	20133739	2784	2	1	0	2	0	0.178891
region_978	chr22	20579554	20994657	415103	100	0	4	2	15	1.25224
region_979	chr22	21387732	23321863	1934131	287	0	0	0	1	0.0596303
region_980	chr22	23955151	24344094	388943	66	18	35	10	36	5.9034
region_981	chr22	39492372	39985654	493282	37	0	0	0	4	0.238521	N
region_982	chr22	41141590	41307070	165480	16	1	0	0	1	0.119261
region_983	chr22	43740652	43835806	95154	24	0	0	1	0	0.0596303	N
region_984	chr22	47717274	48342681	625407	230	0	1	0	0	0.0596303
region_985	chr22	48514497	48990805	476308	62	0	3	0	1	0.238521
region_986	chrX	34419	3671525	3637106	369	352	110	133	166	45.3787
region_987	chrX	3804138	4250864	446726	80	0	0	0	1	0.0596303
region_988	chrX	4871476	8751048	3879572	437	5	26	0	10	2.44484
region_989	chrX	8959418	9193966	234548	31	1	0	0	0	0.0596303
region_990	chrX	10914993	11391705	476712	26	0	1	0	0	0.0596303
region_991	chrX	12303938	12432400	128462	16	1	0	0	0	0.0596303	N
region_992	chrX	13818792	14020784	201992	16	0	1	1	0	0.119261	N
region_993	chrX	15628137	15802319	174182	15	0	0	0	1	0.0596303	N
region_994	chrX	16204230	17168628	964398	46	6	11	2	25	2.62373
region_995	chrX	18052765	18257886	205121	6	1	0	0	1	0.119261	N
region_996	chrX	18469043	18961352	492309	34	0	0	0	1	0.0596303
region_997	chrX	19318302	20034969	716667	31	0	0	0	1	0.0596303	N
region_998	chrX	20693391	21071174	377783	10	12	1	1	0	0.834824	N
region_999	chrX	21265490	23005764	1740274	243	8	4	2	0	0.834824
region_1000	chrX	23643850	23891366	247516	24	0	0	0	1	0.0596303	N
region_1001	chrX	24889562	25076299	186737	17	0	1	0	1	0.119261	N
region_1002	chrX	25239560	25985341	745781	78	1	0	0	3	0.238521	N
region_1003	chrX	26892959	27219509	326550	35	0	1	0	0	0.0596303	N
region_1004	chrX	28442352	28636873	194521	28	0	1	0	0	0.0596303
region_1005	chrX	29662574	30091006	428432	45	0	1	0	0	0.0596303
region_1006	chrX	30412498	30558173	145675	13	0	0	0	1	0.0596303
region_1007	chrX	31083245	31380495	297250	31	0	1	0	1	0.119261
region_1008	chrX	31438080	31526302	88222	13	1	0	0	0	0.0596303	N
region_1009	chrX	33540382	33917680	377298	35	4	0	1	0	0.298151
region_1010	chrX	33978609	35258643	1280034	106	0	2	0	0	0.119261
region_1011	chrX	35645454	35826829	181375	15	0	1	0	2	0.178891	N
region_1012	chrX	37037193	37106071	68878	8	0	1	0	0	0.0596303	N
region_1013	chrX	37216081	37287281	71200	11	0	0	0	2	0.119261	N
region_1014	chrX	37458539	37732262	273723	32	0	1	0	0	0.0596303
region_1015	chrX	38740474	39165403	424929	43	0	1	1	0	0.119261	N
region_1016	chrX	40869464	41270961	401497	26	0	1	0	2	0.178891
region_1017	chrX	41681640	41803583	121943	13	0	0	0	1	0.0596303
region_1018	chrX	41967575	42083384	115809	5	2	0	1	0	0.178891
region_1019	chrX	44175606	44405394	229788	14	0	0	7	0	0.417412	N
region_1020	chrX	44744674	44967567	222893	23	0	1	0	0	0.0596303	N
region_1021	chrX	45788719	45880990	92271	12	1	0	2	0	0.178891	N
region_1022	chrX	46060658	46228920	168262	14	0	0	0	1	0.0596303	N
region_1023	chrX	46498983	46718435	219452	5	0	0	0	1	0.0596303
region_1024	chrX	46792847	46864320	71473	6	1	0	0	0	0.0596303	N
region_1025	chrX	47340247	48230266	890019	56	15	5	7	10	2.20632
region_1026	chrX	48433088	48594693	161605	5	1	0	0	1	0.119261
region_1027	chrX	48777053	48929670	152617	10	1	0	0	0	0.0596303
region_1028	chrX	49373573	49645607	272034	9	2	21	0	0	1.3715
region_1029	chrX	51023518	51827582	804064	29	16	10	7	0	1.9678	N
region_1030	chrX	52497613	52544052	46439	3	0	13	0	1	0.834824	N
region_1031	chrX	52716966	53207983	491017	15	7	0	30	0	2.20632	N
region_1032	chrX	53550655	56979440	3428785	147	19	9	9	31	4.05486
region_1033	chrX	57299900	57498229	198329	8	0	0	1	0	0.0596303	N
region_1034	chrX	57677350	58166239	488889	11	1	1	0	3	0.298151
region_1035	chrX	62515617	63178696	663079	9	4	1	9	1	0.894454	N
region_1036	chrX	63556657	63753953	197296	8	2	0	1	0	0.178891
region_1037	chrX	63861422	65315199	1453777	46	6	2	4	1	0.775194
region_1038	chrX	65439102	65892903	453801	26	4	0	1	0	0.298151	N
region_1039	chrX	66021338	67249995	1228657	60	0	11	2	0	0.775194
region_1040	chrX	67577557	67812095	234538	19	0	0	0	3	0.178891	N
region_1041	chrX	68711499	68809284	97785	11	0	0	4	0	0.238521	N
region_1042	chrX	69686995	69938346	251351	11	0	1	0	0	0.0596303
region_1043	chrX	70004562	70686070	681508	11	1	0	0	1	0.119261
region_1044	chrX	72017913	72241490	223577	11	0	2	2	0	0.238521	N
region_1045	chrX	72664724	72836694	171970	16	0	0	1	0	0.0596303	N
region_1046	chrX	73106629	73341961	235332	11	0	2	0	0	0.119261	N
region_1047	chrX	74212879	74692484	479605	27	0	5	1	0	0.357782
region_1048	chrX	75684661	76015615	330954	43	1	0	1	0	0.119261
region_1049	chrX	76599417	78024865	1425448	47	14	7	44	20	5.06857
region_1050	chrX	78647985	79089654	441669	53	2	1	0	0	0.178891
region_1051	chrX	79654291	82402254	2747963	111	91	49	58	108	18.2469
region_1052	chrX	82602592	83059928	457336	10	15	24	12	21	4.29338
region_1053	chrX	83254263	84283193	1028930	79	0	6	0	1	0.417412	N
region_1054	chrX	86544606	86668883	124277	19	0	0	1	0	0.0596303	N
region_1055	chrX	87038261	87294372	256111	30	0	0	0	1	0.0596303	N
region_1056	chrX	87726957	87901291	174334	11	0	0	0	1	0.0596303	N
region_1057	chrX	88323846	89687652	1363806	22	4	46	20	82	9.0638
region_1058	chrX	90109717	91757761	1648044	60	25	10	62	51	8.82528
region_1059	chrX	92382892	92579096	196204	19	0	0	0	1	0.0596303	N
region_1060	chrX	92681507	92935120	253613	22	0	2	0	0	0.119261	N
region_1061	chrX	93278197	93421558	143361	19	0	0	1	0	0.0596303	N
region_1062	chrX	93628617	94348295	719678	43	0	1	0	3	0.238521	N
region_1063	chrX	94422497	94579041	156544	8	0	0	1	0	0.0596303	N
region_1064	chrX	94813454	95710011	896557	84	1	1	0	0	0.119261
region_1065	chrX	96311333	96350029	38696	6	0	0	0	1	0.0596303	N
region_1066	chrX	97612605	97930570	317965	24	0	0	0	2	0.119261
region_1067	chrX	98255045	98359177	104132	9	0	0	1	0	0.0596303
region_1068	chrX	98415880	98581873	165993	9	0	0	1	0	0.0596303
region_1069	chrX	98844426	99157959	313533	19	1	0	3	0	0.238521
region_1070	chrX	99834404	99969121	134717	9	0	1	0	0	0.0596303	N
region_1071	chrX	100543870	100826386	282516	29	0	1	0	0	0.0596303	N
region_1072	chrX	101003734	101207931	204197	23	0	1	4	0	0.298151	N
region_1073	chrX	101611242	101690553	79311	8	0	0	0	2	0.119261	N
region_1074	chrX	102703987	102917602	213615	17	0	0	1	0	0.0596303
region_1075	chrX	102967924	103852118	884194	47	4	19	2	4	1.72928
region_1076	chrX	104087799	104193217	105418	8	0	0	1	0	0.0596303
region_1077	chrX	104638126	104919687	281561	8	17	0	0	1	1.07335
region_1078	chrX	106166231	106551471	385240	21	0	0	1	2	0.178891
region_1079	chrX	106586675	106848254	261579	20	0	2	0	6	0.477042	N
region_1080	chrX	107199292	108444141	1244849	63	6	1	16	58	4.83005	N
region_1081	chrX	109161082	110057433	896351	66	0	6	0	0	0.357782
region_1082	chrX	110097353	110237476	140123	21	0	1	0	0	0.0596303	N
region_1083	chrX	112096618	112636268	539650	44	9	99	0	28	8.10972	N
region_1084	chrX	112886655	113222943	336288	20	1	1	0	0	0.119261
region_1085	chrX	113400177	113641262	241085	19	7	0	2	0	0.536673
region_1086	chrX	113959563	114228543	268980	35	0	1	0	0	0.0596303
region_1087	chrX	114518328	114681161	162833	11	0	0	1	0	0.0596303
region_1088	chrX	114819604	114899489	79885	6	1	0	0	0	0.0596303	N
region_1089	chrX	115026008	115356299	330291	38	0	4	0	10	0.834824
region_1090	chrX	115778080	116049395	271315	27	1	0	0	0	0.0596303
region_1091	chrX	116258339	116387611	129272	29	0	0	1	0	0.0596303
region_1092	chrX	117016814	117729741	712927	71	0	1	0	1	0.119261
region_1093	chrX	118129922	118481202	351280	27	0	1	1	1	0.178891	N
region_1094	chrX	118817026	119493979	676953	54	0	3	0	3	0.357782
region_1095	chrX	119985578	120846310	860732	83	0	0	0	1	0.0596303
region_1096	chrX	121215896	121815595	599699	38	0	1	0	0	0.0596303
region_1097	chrX	121896758	122034564	137806	30	0	0	1	0	0.0596303
region_1098	chrX	122626509	122783077	156568	13	0	1	1	0	0.119261
region_1099	chrX	123239541	123554113	314572	41	0	1	0	0	0.0596303	N
region_1100	chrX	124158231	124556884	398653	36	0	1	0	0	0.0596303
region_1101	chrX	124726540	124886306	159766	8	0	0	1	0	0.0596303	N
region_1102	chrX	124914615	125261962	347347	45	0	1	1	0	0.119261	N
region_1103	chrX	126151460	126427641	276181	23	0	0	2	0	0.119261	N
region_1104	chrX	126503360	127774419	1271059	88	1	1	9	0	0.655933
region_1105	chrX	128688347	129118995	430648	24	0	0	0	2	0.119261
region_1106	chrX	129743533	130876349	1132816	76	0	2	0	3	0.298151
region_1107	chrX	131268675	131362394	93719	7	1	0	0	0	0.0596303
region_1108	chrX	131463771	131799718	335947	17	0	1	1	2	0.238521
region_1109	chrX	131915071	132037183	122112	7	0	1	0	0	0.0596303
region_1110	chrX	132360078	132385889	25811	3	1	0	0	0	0.0596303
region_1111	chrX	132890940	133073000	182060	15	0	0	0	2	0.119261
region_1112	chrX	133185428	134635914	1450486	60	0	4	0	8	0.715564
region_1113	chrX	135137064	135292015	154951	14	0	1	0	0	0.0596303
region_1114	chrX	136238655	137496516	1257861	92	0	7	0	4	0.655933
region_1115	chrX	137930552	138044786	114234	85	0	1	1	0	0.119261
region_1116	chrX	138170352	138761075	590723	60	0	1	0	0	0.0596303
region_1117	chrX	138670371	138914622	244251	25	1	1	1	1	0.238521
region_1118	chrX	139947192	140553971	606779	20	2	4	6	4	0.954085
region_1119	chrX	140649041	140859030	209989	24	1	1	0	0	0.119261
region_1120	chrX	141335938	141622142	286204	35	0	1	1	0	0.119261
region_1121	chrX	141809396	141946563	137167	10	0	1	0	0	0.0596303	N
region_1122	chrX	142145153	142432254	287101	33	0	1	0	0	0.0596303
region_1123	chrX	143059574	143336981	277407	27	0	0	3	0	0.178891	N
region_1124	chrX	143388819	144286316	897497	101	0	0	1	1	0.119261	N
region_1125	chrX	145286097	145430965	144868	24	0	0	0	1	0.0596303	N
region_1126	chrX	145535441	145742634	207193	25	0	1	0	0	0.0596303	N
region_1127	chrX	146184018	146653015	468997	58	1	2	0	0	0.178891
region_1128	chrX	146792735	147236308	443573	42	1	1	0	0	0.119261
region_1129	chrX	148391695	148672155	280460	16	2	9	0	0	0.655933
region_1130	chrX	149168714	149836229	667515	60	0	1	0	1	0.119261	N
region_1131	chrX	151349058	151439734	90676	5	1	0	0	0	0.0596303	N
region_1132	chrX	151920735	152100991	180256	25	0	3	0	5	0.477042
region_1133	chrX	152220566	152454713	234147	17	0	0	0	1	0.0596303
region_1134	chrX	152521102	153297983	776881	29	21	4	0	16	2.44484
region_1135	chrX	154316684	154479679	162995	5	0	13	2	1	0.954085
Note: N means novel CNVR
