# Supplementary material for: Whole Genome Distribution and Ethnic Differentiation of Copy Number Variation in Caucasian and Asian Populations
Source: PLoS One. 2009 Nov 23;4(11):e7958. doi: 10.1371/journal.pone.0007958 (PMC2776354; doi:10.1371/journal.pone.0007958)
Supplement: Table S5 — (0.31 MB XLS) [file pone.0007958.s007.xls]

## Sheet: Sheet1
Supplementary Table 5: Summary of OMIM genes overlap with CNVRs
Region_ID	CHI			CAU			MIM #	Location	Symbol
	# Gain	# Loss	CNV occurrence rate(%)	# Gain	# Loss	CNV occurrence rate(%)
region_14	0	10	1.44509	0	4	0.406091	603623	1p35	YARS, CMTDIC, TYRRS, YTS, YRS
region_44	18	11	4.19075	5	9	1.42132	608374	1q21	HJV, HFE2A
region_45	80	97	25.578	56	186	24.5685	600897	1q21.1	GJA8, CX50, CAE1
region_55	11	13	3.46821	2	23	2.53807	134580	1q31-q32.1	F13B
region_55	11	13	3.46821	2	23	2.53807	134370	1q32	HF1, CFH, HUS, ARMD4
region_121	10	3	1.87861	11	4	1.52284	607100	2q13	NPHP1, NPH1, SLSN1, JBTS4
region_172	2	2	0.578035	1	73	7.51269	609186	2p25.3	D2HGD
region_197	0	0	0	2	18	2.03046	212138	3p21.31	SLC25A20, CACT, CAC
region_243	14	4	2.60116	11	2	1.3198	126453	4p16.1-p15.3	DRD5, DRD1B, DRD1L2
region_377	0	10	1.44509	0	1	0.101523	601022	6p21.3	NFKBIL1
region_377	0	10	1.44509	0	1	0.101523	153440	6p21.3	LTA, TNFB
region_377	0	10	1.44509	0	1	0.101523	191160	6p21.3	TNF, TNFA
region_430	1	0	0.144509	8	2	1.01523	602686	7p22	MAD1L1, TXBP181
region_536	1	22	3.3237	0	16	1.62437	607817	8q22-q23	COH1
region_663	0	9	1.30058	1	0	0.101523	602141	11q13	NDUFS8
region_663	0	9	1.30058	1	0	0.101523	604592	11q13.4-q13.5	TCIRG1, TIRC7, OC116, OPTB1
region_689	6	4	1.44509	4	5	0.913706	602861	12p11	PKP2, ARVD9
region_775	203	153	51.4451	261	229	49.7462	608145	15q11.1	NIPA1, SPG6
region_780	13	0	1.87861	12	0	1.21827	118511	15q14	CHRNA7
region_825	2	10	1.7341	18	5	2.33503	607038	16p12.2	OTOA, DFNB22
region_830	4	0	0.578035	11	2	1.3198	108730	16p12	ATP2A1, SERCA1
region_830	4	0	0.578035	11	2	1.3198	607042	16p12.1	CLN3, BTS
region_870	8	0	1.15607	411	1	41.8274	157140	17q21.1	MAPT, MTBT1, DDPAC, MSTD
region_914	4	3	1.01156	0	0	0	601825	19p13	NDUFS7, PSST
region_914	4	3	1.01156	0	0	0	602216	19p13.3	STK11, PJS, LKB1
region_914	4	3	1.01156	0	0	0	601240	19p13.3	GAMT
region_915	2	7	1.30058	0	0	0	600957	19p13.3-p13.2	AMH, MIF
region_976	6	2	1.15607	9	4	1.3198	605566	22q11	RTN4R, NOGOR
region_976	6	2	1.15607	9	4	1.3198	606810	22q11.2	PRODH, PRODH2, SCZD4
region_976	6	2	1.15607	9	4	1.3198	138720	22q11.2	GP1BB
region_976	6	2	1.15607	9	4	1.3198	602054	22q11.2	TBX1, DGS, CTHM, CAFS, TGA, DORV, VCFS, DGCR
region_976	6	2	1.15607	9	4	1.3198	116790	22q11.2	COMT
region_976	6	2	1.15607	9	4	1.3198	604202	22q11.2	SNAP29, CEDNIK
region_986	352	110	46.9036	133	166	43.2081	300180	Xp22.3	ARSE, CDPX1, CDPXR
region_986	352	110	46.9036	133	166	43.2081	306250	Xp22.32	CSF2RA
region_986	352	110	46.9036	133	166	43.2081	314700	Xpter-p22.32	XG
region_988	5	26	3.14721	0	10	1.44509	300427	Xp22.33	NLGN4, KIAA1260, AUTSX2, ASPGX2
region_988	5	26	3.14721	0	10	1.44509	308100	Xp22.32	STS, ARSC1, ARSC, SSDD
region_988	5	26	3.14721	0	10	1.44509	308700	Xp22.3	KAL1, KMS, ADMLX
region_994	6	11	1.72589	2	25	3.90173	300457	Xp22.13	NHS
region_999	8	4	1.21827	2	0	0.289017	300105	Xp22.1	SMS, SRS, MRSR
region_999	8	4	1.21827	2	0	0.289017	300550	Xp22.2-p22.1	PHEX, HYP, HPDR1
region_1025	15	5	2.03046	7	10	2.45665	300205	Xp11.23-p11.22	EBP, CDPX2, CPXD, CPX
region_1025	15	5	2.03046	7	10	2.45665	300326	Xp11.2	SSX4
region_1025	15	5	2.03046	7	10	2.45665	300499	Xp11.23	FTSJ1, JM23, SPB1, MRX44, MRX9
region_1025	15	5	2.03046	7	10	2.45665	312820	Xp11.2	SSX1, SSRC
region_1025	15	5	2.03046	7	10	2.45665	314998	Xp22.1-p11	ZNF81, MRX45
region_1028	2	21	2.33503	0	0	0	300008	Xp11.22	CLCN5, CLCK2, NPHL2, DENTS, NPHL1
region_1031	7	0	0.71066	30	0	4.33526	314690	Xp11.22-p11.21	SMCX, MRXSJ, DXS1272E, XE169, JARID1C
region_1032	19	9	2.84264	9	31	5.78035	300546	Xp11.21	FGD1, FGDY, AAS
region_1032	19	9	2.84264	9	31	5.78035	301300	Xp11.21	ALAS2, ANH1, ASB
region_1039	0	11	1.11675	2	0	0.289017	300127	Xq12	OPHN1, MRX60
region_1039	0	11	1.11675	2	0	0.289017	313700	Xq11-q12	AR, DHTR, TFM, SBMA, KD, SMAX1
region_1049	14	7	2.13198	44	20	9.24855	300011	Xq12-q13	ATP7A, MNK, MK, OHS
region_1049	14	7	2.13198	44	20	9.24855	300032	Xq13	ATRX, XH2, XNP, MRXS3, SHS, SFM1, MRXHF1
region_1049	14	7	2.13198	44	20	9.24855	311800	Xq13	PGK1, PGKA
region_1080	6	1	0.71066	16	58	10.6936	303630	Xq22.3	COL4A5, ATS, ASLN
region_1080	6	1	0.71066	16	58	10.6936	303631	Xq22.3	COL4A6
region_1089	0	4	0.406091	0	10	1.44509	300034	Xq22-q23	AGTR2, MRX88
region_1107	6	21	2.74112	9	22	4.47977	300037	Xq26	GPC3, SDYS, SGBS1
region_1107	6	21	2.74112	9	22	4.47977	300265	Xq26.2	ZIC3, HTX1, HTX
region_1107	6	21	2.74112	9	22	4.47977	300267	Xq26	ARHGEF6, MRX46, COOL2
region_1107	6	21	2.74112	9	22	4.47977	300309	Xq26.2	USP26
region_1107	6	21	2.74112	9	22	4.47977	300386	Xq26	TNFSF5, CD40LG, HIGM1, IGM
region_1107	6	21	2.74112	9	22	4.47977	300414	Xq26.3	PHF6, BFLS
region_1107	6	21	2.74112	9	22	4.47977	306900	Xq27.1-q27.2	F9, HEMB
region_1107	6	21	2.74112	9	22	4.47977	308000	Xq26-q27.2	HPRT1, HPRT
region_1107	6	21	2.74112	9	22	4.47977	313430	Xq26.3	SOX3, MRGH
region_1134	21	4	2.53807	0	16	2.31214	300005	Xq28	MECP2, RTT, PPMX, MRX16, MRX79, AUTSX3, MRXSL, MRXS13, MRX79, MRX16
region_1134	21	4	2.53807	0	16	2.31214	300044	Xq28	TKTL1, TKT2, TKR
region_1134	21	4	2.53807	0	16	2.31214	300104	Xq28	GDI1, RABGD1A, MRX41, MRX48
region_1134	21	4	2.53807	0	16	2.31214	300371	Xq28	ABCD1, ALD, AMN
region_1134	21	4	2.53807	0	16	2.31214	300384	Xq28	EMD, EDMD, STA
region_1134	21	4	2.53807	0	16	2.31214	300394	Xq28	TAZ, EFE2, BTHS, CMD3A, LVNCX
region_1134	21	4	2.53807	0	16	2.31214	300538	Xq28	AVPR2, DIR, DI1, ADHR
region_1134	21	4	2.53807	0	16	2.31214	303800	Xq28	OPN1MW, GCP, CBD, CBBM
region_1134	21	4	2.53807	0	16	2.31214	308840	Xq28	L1CAM, CAML1, HSAS1

## Sheet: Sheet2
region	311	region_311
region	315	region_315
region	315	region_315
region	316	region_316
region	316	region_316
region	318	region_318
region	321	region_321
region	328	region_328
region	330	region_330
region	330	region_330
region	337	region_337
region	347	region_347
region	351	region_351
region	356	region_356
region	361	region_361
region	365	region_365
region	372	region_372
region	372	region_372
region	373	region_373
region	388	region_388
region	388	region_388
region	389	region_389
region	396	region_396
region	399	region_399
region	400	region_400
region	400	region_400
region	400	region_400
region	401	region_401
region	407	region_407
region	407	region_407
region	407	region_407
region	407	region_407
region	408	region_408
region	420	region_420
region	420	region_420
region	422	region_422
region	422	region_422
region	422	region_422
region	452	region_452
region	479	region_479
region	481	region_481
region	498	region_498
region	498	region_498
region	505	region_505
region	523	region_523
region	527	region_527
region	530	region_530
region	545	region_545
region	556	region_556
region	561	region_561
region	563	region_563
region	563	region_563
region	563	region_563
region	563	region_563
region	563	region_563
region	563	region_563
region	566	region_566
region	566	region_566
region	566	region_566
region	566	region_566
region	566	region_566
region	566	region_566
region	568	region_568
region	572	region_572
region	572	region_572
region	580	region_580
region	582	region_582
region	597	region_597
region	607	region_607
region	610	region_610
region	626	region_626
region	626	region_626
region	634	region_634
region	640	region_640
region	643	region_643
region	658	region_658
region	661	region_661
region	668	region_668
region	669	region_669
region	671	region_671
region	672	region_672
region	675	region_675
region	685	region_685
region	692	region_692
region	692	region_692
region	702	region_702
region	704	region_704
region	705	region_705
region	705	region_705
region	705	region_705
region	709	region_709
region	711	region_711
region	712	region_712
region	714	region_714
region	730	region_730
region	730	region_730
region	731	region_731
region	751	region_751
region	767	region_767
region	769	region_769
region	773	region_773
region	773	region_773
region	773	region_773
region	777	region_777
region	777	region_777
region	777	region_777
region	809	region_809
region	811	region_811
region	812	region_812
region	821	region_821
region	830	region_830
region	865	region_865
region	873	region_873
region	891	region_891
region	892	region_892
region	899	region_899
region	907	region_907
region	911	region_911
region	911	region_911
region	912	region_912
region	915	region_915
region	917	region_917
region	918	region_918
region	918	region_918
region	924	region_924
region	936	region_936
region	944	region_944
region	944	region_944
region	948	region_948
region	949	region_949
region	951	region_951
region	976	region_976
region	980	region_980
region	982	region_982
region	982	region_982
region	984	region_984
region	985	region_985
region	985	region_985

## Sheet: Sheet3
region_1025	15	5	2.03046	7	10	2.45665	300205	Xp11.23-p11.22	EBP, CDPX2, CPXD, CPX
region_1025	15	5	2.03046	7	10	2.45665	300326	Xp11.2	SSX4
region_1025	15	5	2.03046	7	10	2.45665	300499	Xp11.23	FTSJ1, JM23, SPB1, MRX44, MRX9
region_1025	15	5	2.03046	7	10	2.45665	312820	Xp11.2	SSX1, SSRC
region_1025	15	5	2.03046	7	10	2.45665	314998	Xp22.1-p11	ZNF81, MRX45
region_1028	2	21	2.33503	0	0	0	300008	Xp11.22	CLCN5, CLCK2, NPHL2, DENTS, NPHL1
region_1031	7	0	0.71066	30	0	4.33526	314690	Xp11.22-p11.21	SMCX, MRXSJ, DXS1272E, XE169, JARID1C
region_1032	19	9	2.84264	9	31	5.78035	300546	Xp11.21	FGD1, FGDY, AAS
region_1032	19	9	2.84264	9	31	5.78035	301300	Xp11.21	ALAS2, ANH1, ASB
region_1039	0	11	1.11675	2	0	0.289017	300127	Xq12	OPHN1, MRX60
region_1039	0	11	1.11675	2	0	0.289017	313700	Xq11-q12	AR, DHTR, TFM, SBMA, KD, SMAX1
region_1049	14	7	2.13198	44	20	9.24855	300011	Xq12-q13	ATP7A, MNK, MK, OHS
region_1049	14	7	2.13198	44	20	9.24855	300032	Xq13	ATRX, XH2, XNP, MRXS3, SHS, SFM1, MRXHF1
region_1049	14	7	2.13198	44	20	9.24855	311800	Xq13	PGK1, PGKA
region_1080	6	1	0.71066	16	58	10.6936	303630	Xq22.3	COL4A5, ATS, ASLN
region_1080	6	1	0.71066	16	58	10.6936	303631	Xq22.3	COL4A6
region_1089	0	4	0.406091	0	10	1.44509	300034	Xq22-q23	AGTR2, MRX88
region_1107	6	21	2.74112	9	22	4.47977	300037	Xq26	GPC3, SDYS, SGBS1
region_1107	6	21	2.74112	9	22	4.47977	300265	Xq26.2	ZIC3, HTX1, HTX
region_1107	6	21	2.74112	9	22	4.47977	300267	Xq26	ARHGEF6, MRX46, COOL2
region_1107	6	21	2.74112	9	22	4.47977	300309	Xq26.2	USP26
region_1107	6	21	2.74112	9	22	4.47977	300386	Xq26	TNFSF5, CD40LG, HIGM1, IGM
region_1107	6	21	2.74112	9	22	4.47977	300414	Xq26.3	PHF6, BFLS
region_1107	6	21	2.74112	9	22	4.47977	306900	Xq27.1-q27.2	F9, HEMB
region_1107	6	21	2.74112	9	22	4.47977	308000	Xq26-q27.2	HPRT1, HPRT
region_1107	6	21	2.74112	9	22	4.47977	313430	Xq26.3	SOX3, MRGH
region_1134	21	4	2.53807	0	16	2.31214	300005	Xq28	MECP2, RTT, PPMX, MRX16, MRX79, AUTSX3, MRXSL, MRXS13, MRX79, MRX16
region_1134	21	4	2.53807	0	16	2.31214	300044	Xq28	TKTL1, TKT2, TKR
region_1134	21	4	2.53807	0	16	2.31214	300104	Xq28	GDI1, RABGD1A, MRX41, MRX48
region_1134	21	4	2.53807	0	16	2.31214	300371	Xq28	ABCD1, ALD, AMN
region_1134	21	4	2.53807	0	16	2.31214	300384	Xq28	EMD, EDMD, STA
region_1134	21	4	2.53807	0	16	2.31214	300394	Xq28	TAZ, EFE2, BTHS, CMD3A, LVNCX
region_1134	21	4	2.53807	0	16	2.31214	300538	Xq28	AVPR2, DIR, DI1, ADHR
region_1134	21	4	2.53807	0	16	2.31214	303800	Xq28	OPN1MW, GCP, CBD, CBBM
region_1134	21	4	2.53807	0	16	2.31214	308840	Xq28	L1CAM, CAML1, HSAS1
region_121	10	3	1.87861	11	4	1.52284	607100	2q13	NPHP1, NPH1, SLSN1, JBTS4
region_14	0	10	1.44509	0	4	0.406091	603623	1p35	YARS, CMTDIC, TYRRS, YTS, YRS
region_172	2	2	0.578035	1	73	7.51269	609186	2p25.3	D2HGD
region_197	0	0	0	2	18	2.03046	212138	3p21.31	SLC25A20, CACT, CAC
region_243	14	4	2.60116	11	2	1.3198	126453	4p16.1-p15.3	DRD5, DRD1B, DRD1L2
region_377	0	10	1.44509	0	1	0.101523	601022	6p21.3	NFKBIL1
region_377	0	10	1.44509	0	1	0.101523	153440	6p21.3	LTA, TNFB
region_377	0	10	1.44509	0	1	0.101523	191160	6p21.3	TNF, TNFA
region_430	1	0	0.144509	8	2	1.01523	602686	7p22	MAD1L1, TXBP181
region_44	18	11	4.19075	5	9	1.42132	608374	1q21	HJV, HFE2A
region_45	80	97	25.578	56	186	24.5685	600897	1q21.1	GJA8, CX50, CAE1
region_536	1	22	3.3237	0	16	1.62437	607817	8q22-q23	COH1
region_55	11	13	3.46821	2	23	2.53807	134580	1q31-q32.1	F13B
region_55	11	13	3.46821	2	23	2.53807	134370	1q32	HF1, CFH, HUS, ARMD4
region_663	0	9	1.30058	1	0	0.101523	602141	11q13	NDUFS8
region_663	0	9	1.30058	1	0	0.101523	604592	11q13.4-q13.5	TCIRG1, TIRC7, OC116, OPTB1
region_689	6	4	1.44509	4	5	0.913706	602861	12p11	PKP2, ARVD9
region_775	203	153	51.4451	261	229	49.7462	608145	15q11.1	NIPA1, SPG6
region_780	13	0	1.87861	12	0	1.21827	118511	15q14	CHRNA7
region_825	2	10	1.7341	18	5	2.33503	607038	16p12.2	OTOA, DFNB22
region_830	4	0	0.578035	11	2	1.3198	108730	16p12	ATP2A1, SERCA1
region_830	4	0	0.578035	11	2	1.3198	607042	16p12.1	CLN3, BTS
region_870	8	0	1.15607	411	1	41.8274	157140	17q21.1	MAPT, MTBT1, DDPAC, MSTD
region_914	4	3	1.01156	0	0	0	601825	19p13	NDUFS7, PSST
region_914	4	3	1.01156	0	0	0	602216	19p13.3	STK11, PJS, LKB1
region_914	4	3	1.01156	0	0	0	601240	19p13.3	GAMT
region_915	2	7	1.30058	0	0	0	600957	19p13.3-p13.2	AMH, MIF
region_976	6	2	1.15607	9	4	1.3198	605566	22q11	RTN4R, NOGOR
region_976	6	2	1.15607	9	4	1.3198	606810	22q11.2	PRODH, PRODH2, SCZD4
region_976	6	2	1.15607	9	4	1.3198	138720	22q11.2	GP1BB
region_976	6	2	1.15607	9	4	1.3198	602054	22q11.2	TBX1, DGS, CTHM, CAFS, TGA, DORV, VCFS, DGCR
region_976	6	2	1.15607	9	4	1.3198	116790	22q11.2	COMT
region_976	6	2	1.15607	9	4	1.3198	604202	22q11.2	SNAP29, CEDNIK
region_986	352	110	46.9036	133	166	43.2081	300180	Xp22.3	ARSE, CDPX1, CDPXR
region_986	352	110	46.9036	133	166	43.2081	306250	Xp22.32	CSF2RA
region_986	352	110	46.9036	133	166	43.2081	314700	Xpter-p22.32	XG
region_988	5	26	3.14721	0	10	1.44509	300427	Xp22.33	NLGN4, KIAA1260, AUTSX2, ASPGX2
region_988	5	26	3.14721	0	10	1.44509	308100	Xp22.32	STS, ARSC1, ARSC, SSDD
region_988	5	26	3.14721	0	10	1.44509	308700	Xp22.3	KAL1, KMS, ADMLX
region_994	6	11	1.72589	2	25	3.90173	300457	Xp22.13	NHS
region_999	8	4	1.21827	2	0	0.289017	300105	Xp22.1	SMS, SRS, MRSR
region_999	8	4	1.21827	2	0	0.289017	300550	Xp22.2-p22.1	PHEX, HYP, HPDR1
